# Supplementary material for: Influence of hydrophobic residues on the binding of CB[7] toward diammonium ions of common ammonium⋯ammonium distance
Source: Royal Society of Chemistry journal article supplement (doi:10.1039/c5ob00784d), 2015-01-01
Supplement: c5ob00784d1.pdf [file c5ob00784d1.pdf]

## Influence of Hydrophobic Residue on the Binding of CB[7] Toward Diammonium Ions of Common Ammonium•••Ammonium Distance

### Supporting Information

*Liping Cao,<sup>a</sup> Āani Škalamera,<sup>b</sup> Peter Y. Zavalij,<sup>a</sup> Jiří Hostaš,<sup>c</sup> Pavel Hobza,<sup>c,d,\*</sup>  
Kata Mlinarić-Majerski,<sup>b,\*</sup> Robert Glaser,<sup>e,\*</sup> Lyle Isaacs<sup>a,\*</sup>*

<sup>a</sup>Department of Chemistry and Biochemistry, University of Maryland, College Park, Maryland  
20742, United States;

<sup>b</sup>Department of Organic Chemistry and Biochemistry, Ruđer Bošković Institute,  
Bijenička cesta 54, 10000 Zagreb, Croatia;

<sup>c</sup>Institute of Organic Chemistry and Biochemistry, Academy of Sciences of the Czech Republic,  
16610 Praha 6, Czech Republic

<sup>d</sup>Regional Center of Advanced Technologies and Materials, Department of Physical Chemistry,  
Palacký University, 771 46 Olomouc, Czech Republic

<sup>e</sup>Department of Chemistry, Ben-Gurion University of the Negev, Beer-Sheva 84105, Israel

| Table of Contents                                                                                                                        | Pages     |
|------------------------------------------------------------------------------------------------------------------------------------------|-----------|
| <sup>1</sup> H and <sup>13</sup> C NMR spectra for <b>14</b> .....                                                                       | S2 – S3   |
| <sup>1</sup> H NMR spectra recorded for selected CB[7]•guest complexes. ....                                                             | S4 – S11  |
| Determination of $K_{rel}$ for the competition between <b>14</b> and <b>5</b> for CB[7] .....                                            | S12       |
| Determination of $K_a$ for CB[7]• <b>14</b> by competition of <b>14</b> and <b>5</b> for a<br>limiting quantity of CB[7].....            | S12 – S13 |
| Selected <sup>1</sup> H NMR spectra from the $K_a$ and $K_{rel}$ measurements.....                                                       | S13 – S21 |
| Illustration of solvating H <sub>2</sub> O molecules in the structure of CB[7]• <b>14</b> .....                                          | S23       |
| Coordinates of the minimized geometry of CB[7] complexes of<br>Guests <b>1b</b> , <b>3b</b> , <b>3c</b> , <b>9</b> , and <b>14</b> ..... | S24-S44   |
| Plot of $\Delta G_{exptl}$ versus $\Delta G_{calcd}$ .....                                                                               | S45       |
| C-H•••O close contacts in CB[7]• <b>3b</b> , CB[7]• <b>9</b> and CB[7]• <b>14</b> .....                                                  | S46       |

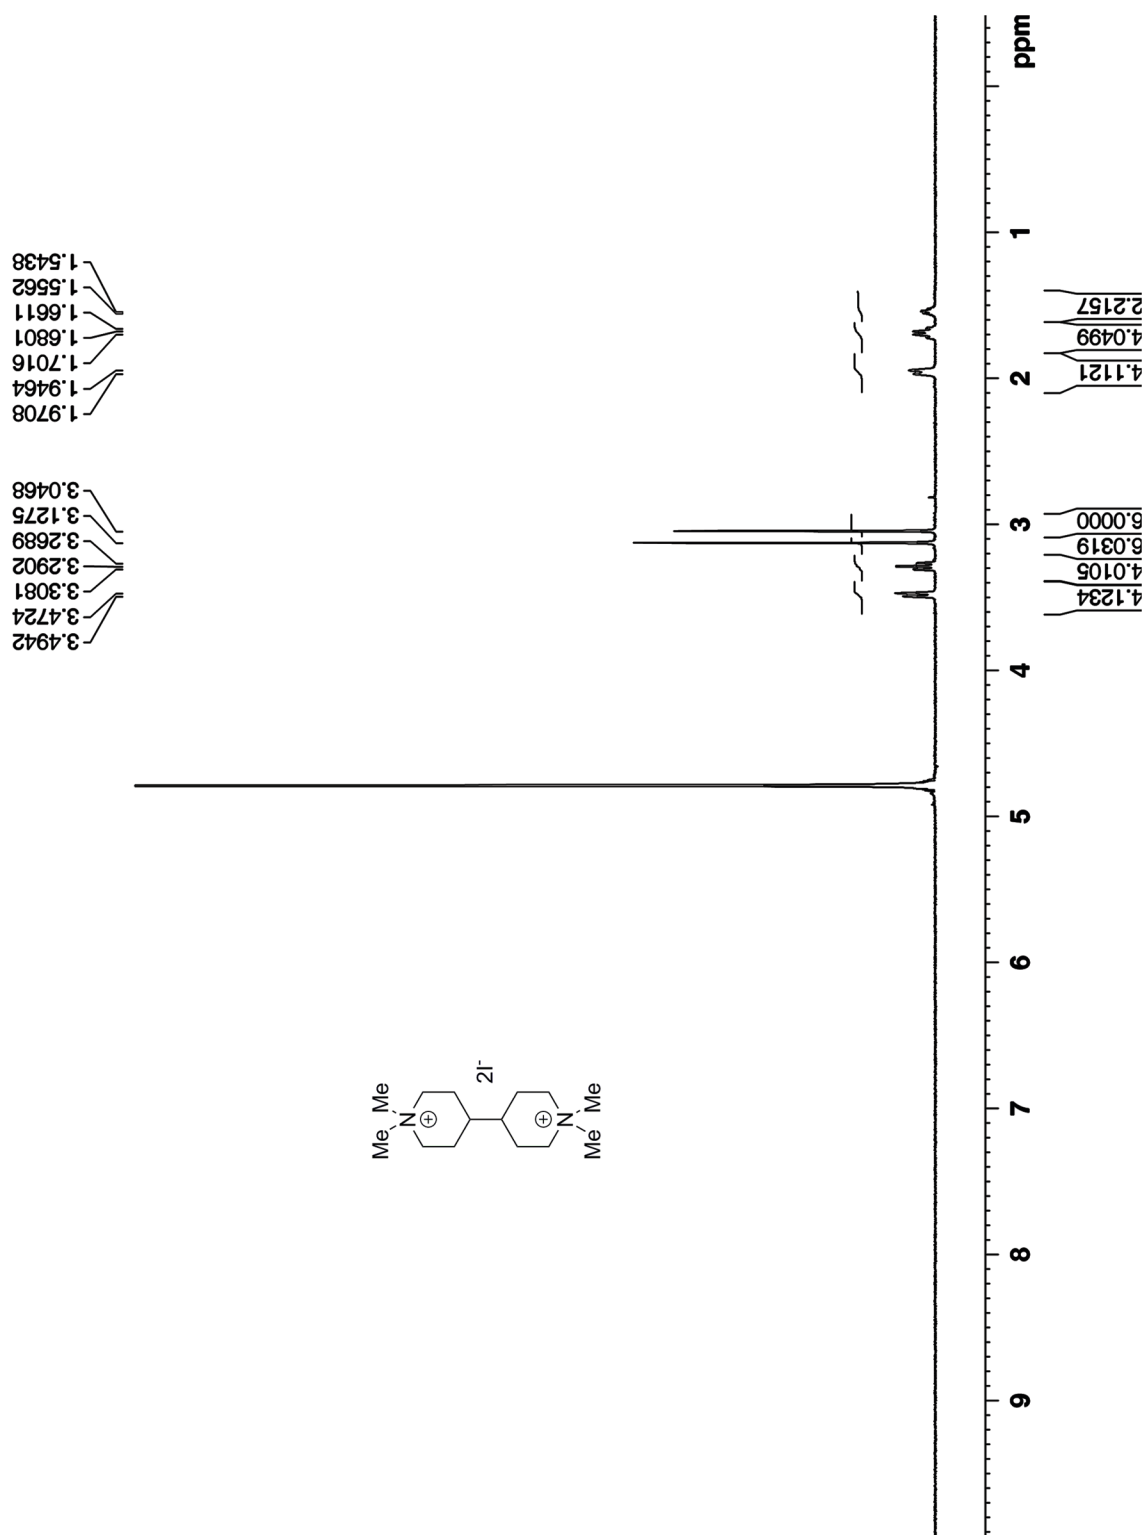

**Figure S1.** <sup>1</sup>H NMR spectrum recorded (600 MHz, D<sub>2</sub>O, RT) for **14**.

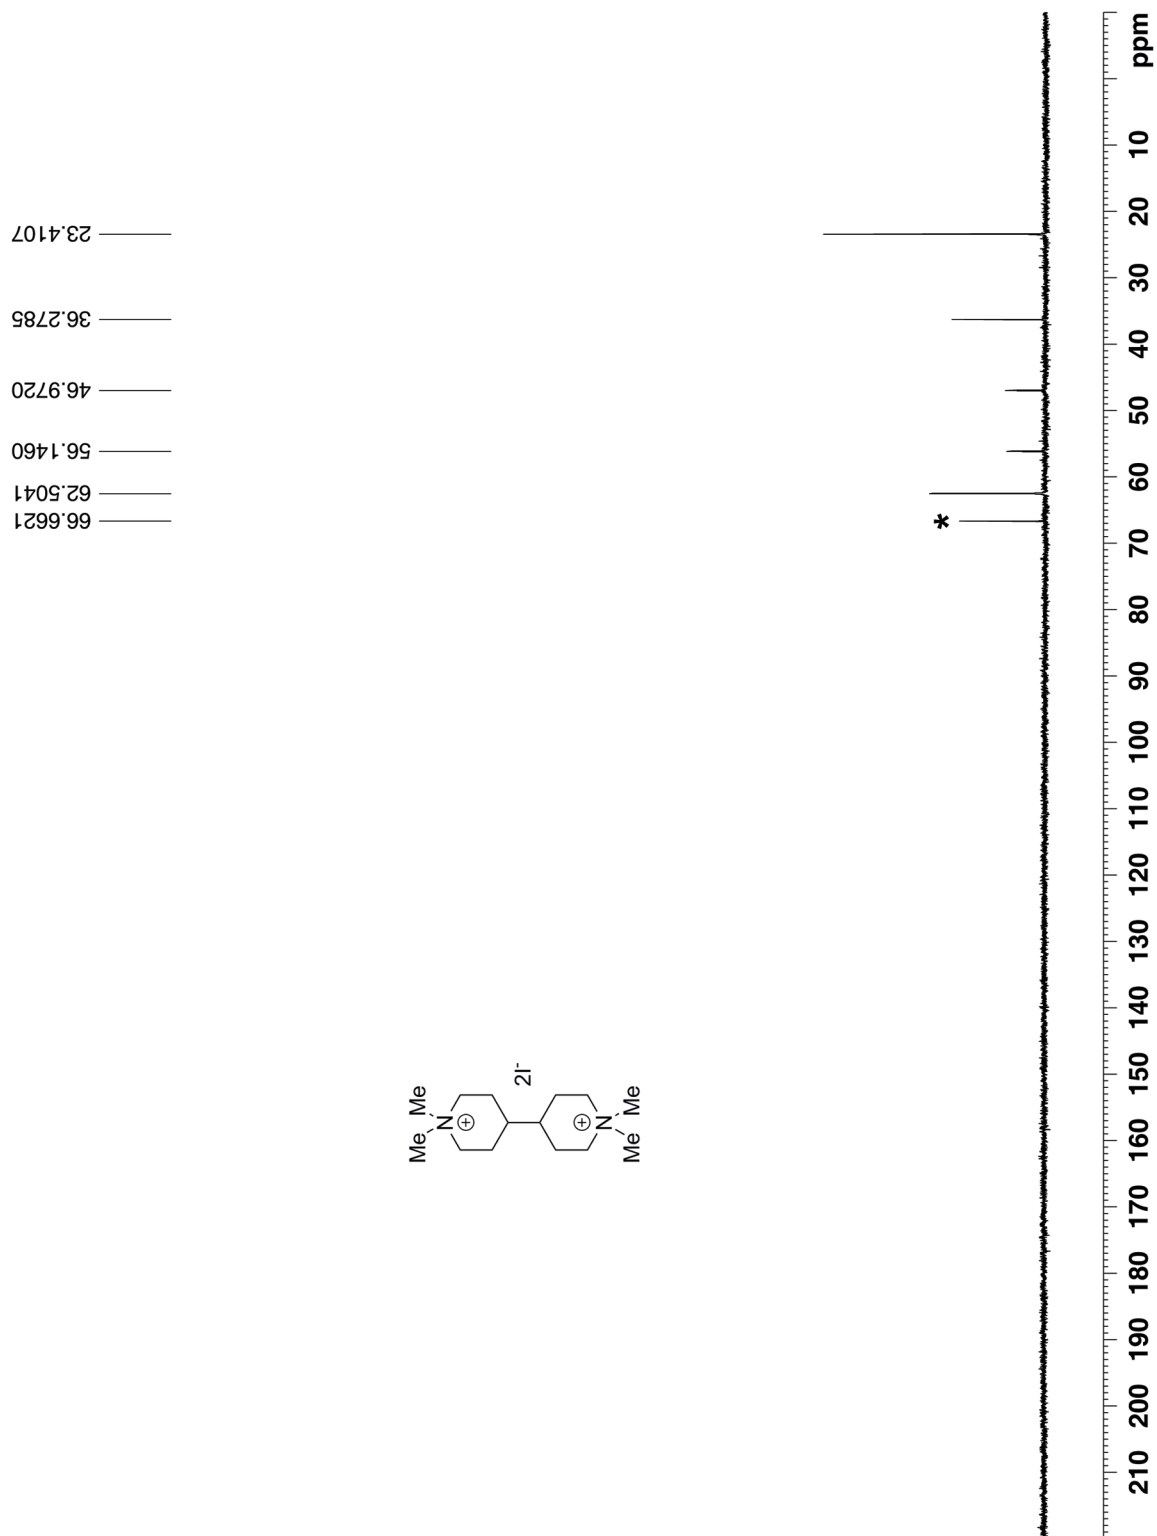

**Figure S2.**  $^{13}\text{C}$  NMR spectrum recorded (125 MHz,  $\text{D}_2\text{O}$ , RT) for **14**. Internal reference = dioxane (\*)

<sup>1</sup>H NMR spectra recorded for selected CB[7]•guest complexes.

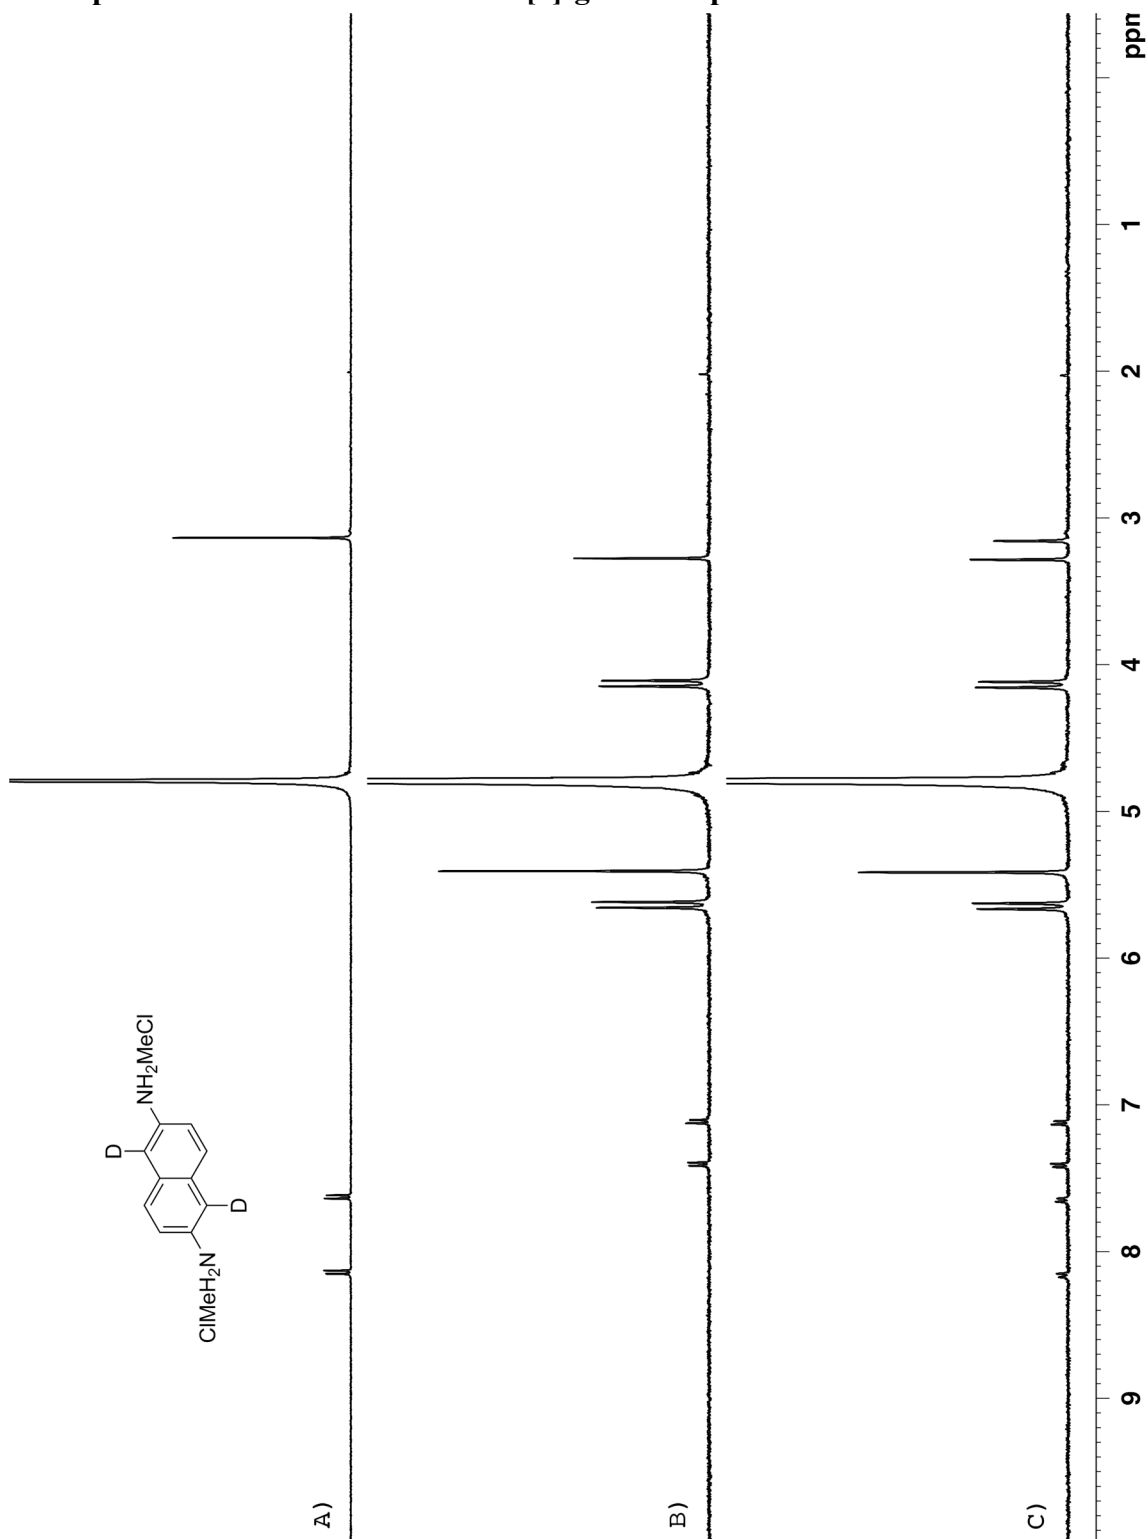

**Figure S3.** <sup>1</sup>H NMR spectra recorded (D<sub>2</sub>O, 400 MHz, RT) for: a) **7** (0.25 mM), b) a mixture of CB[7] (0.25 mM) and **7** (0.25 mM), and c) a mixture of CB[7] (0.25 mM) and **7** (0.5 mM). [Note: D-exchange happened on the 1,5-positions of guest **7** in D<sub>2</sub>O.]

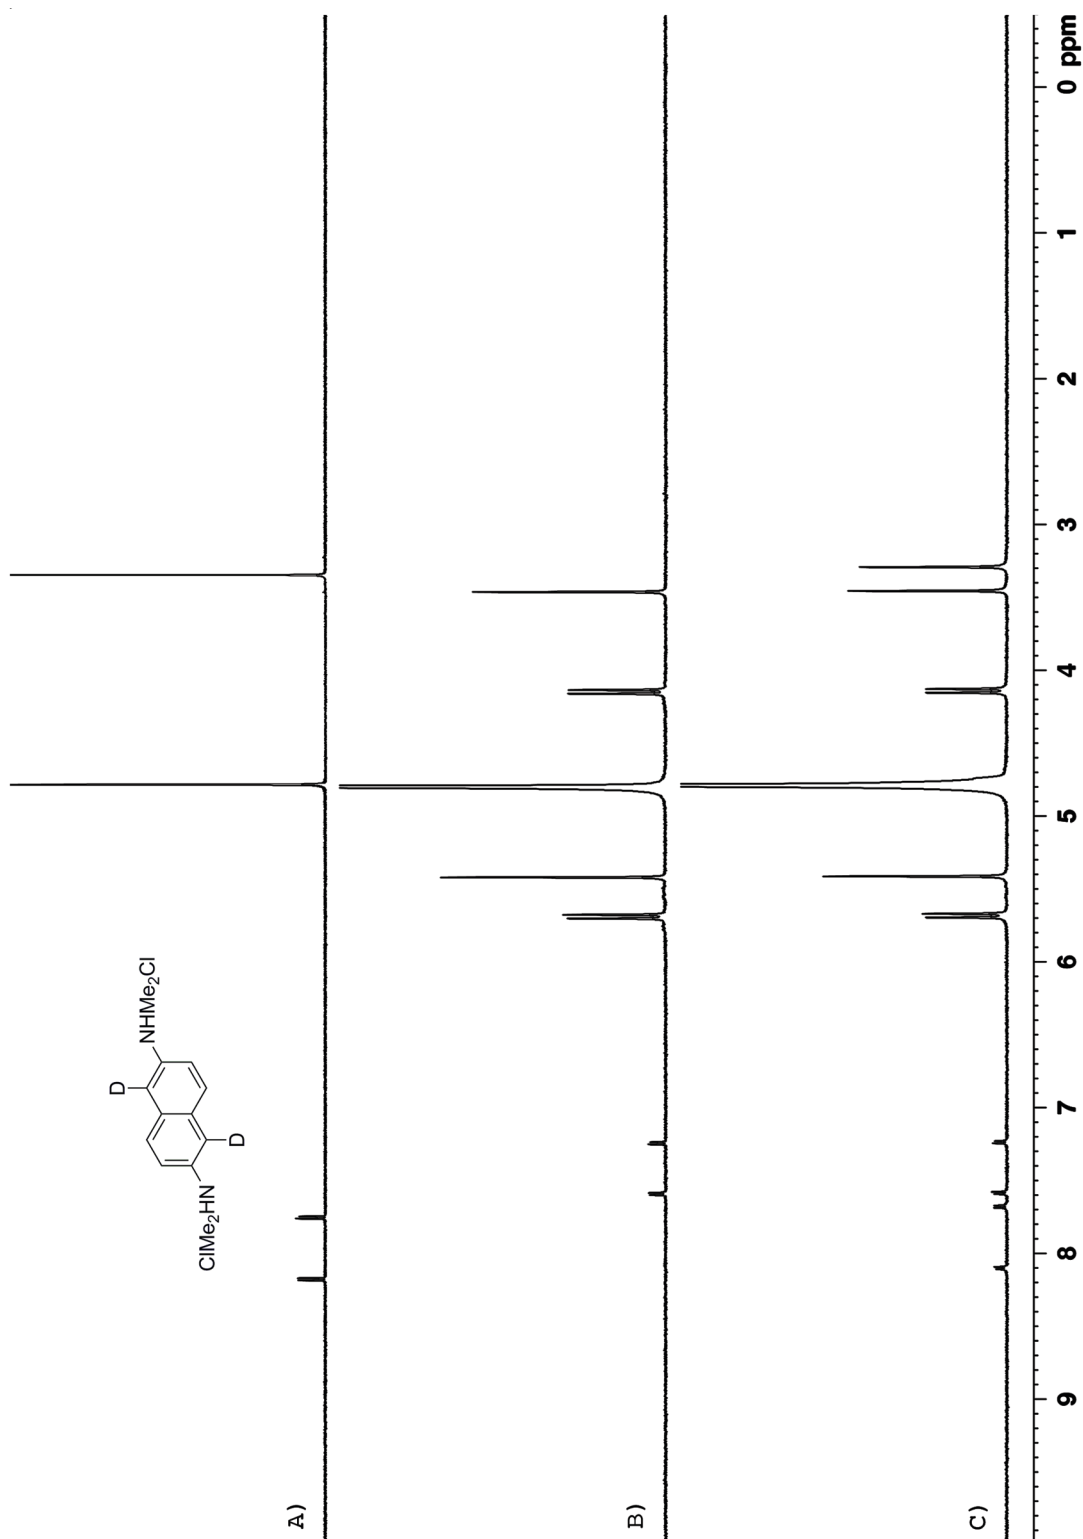

**Figure S4.**  $^1\text{H}$  NMR spectra recorded ( $\text{D}_2\text{O}$ , 400 MHz, RT) for: a) **8** (0.25 mM), b) a mixture of CB[7] (0.25 mM) and **8** (0.25 mM), and c) a mixture of CB[7] (0.25 mM) and **8** (0.5 mM). [Note: D-exchange happened on the 1,5-positions of guest **8** in  $\text{D}_2\text{O}$ .]

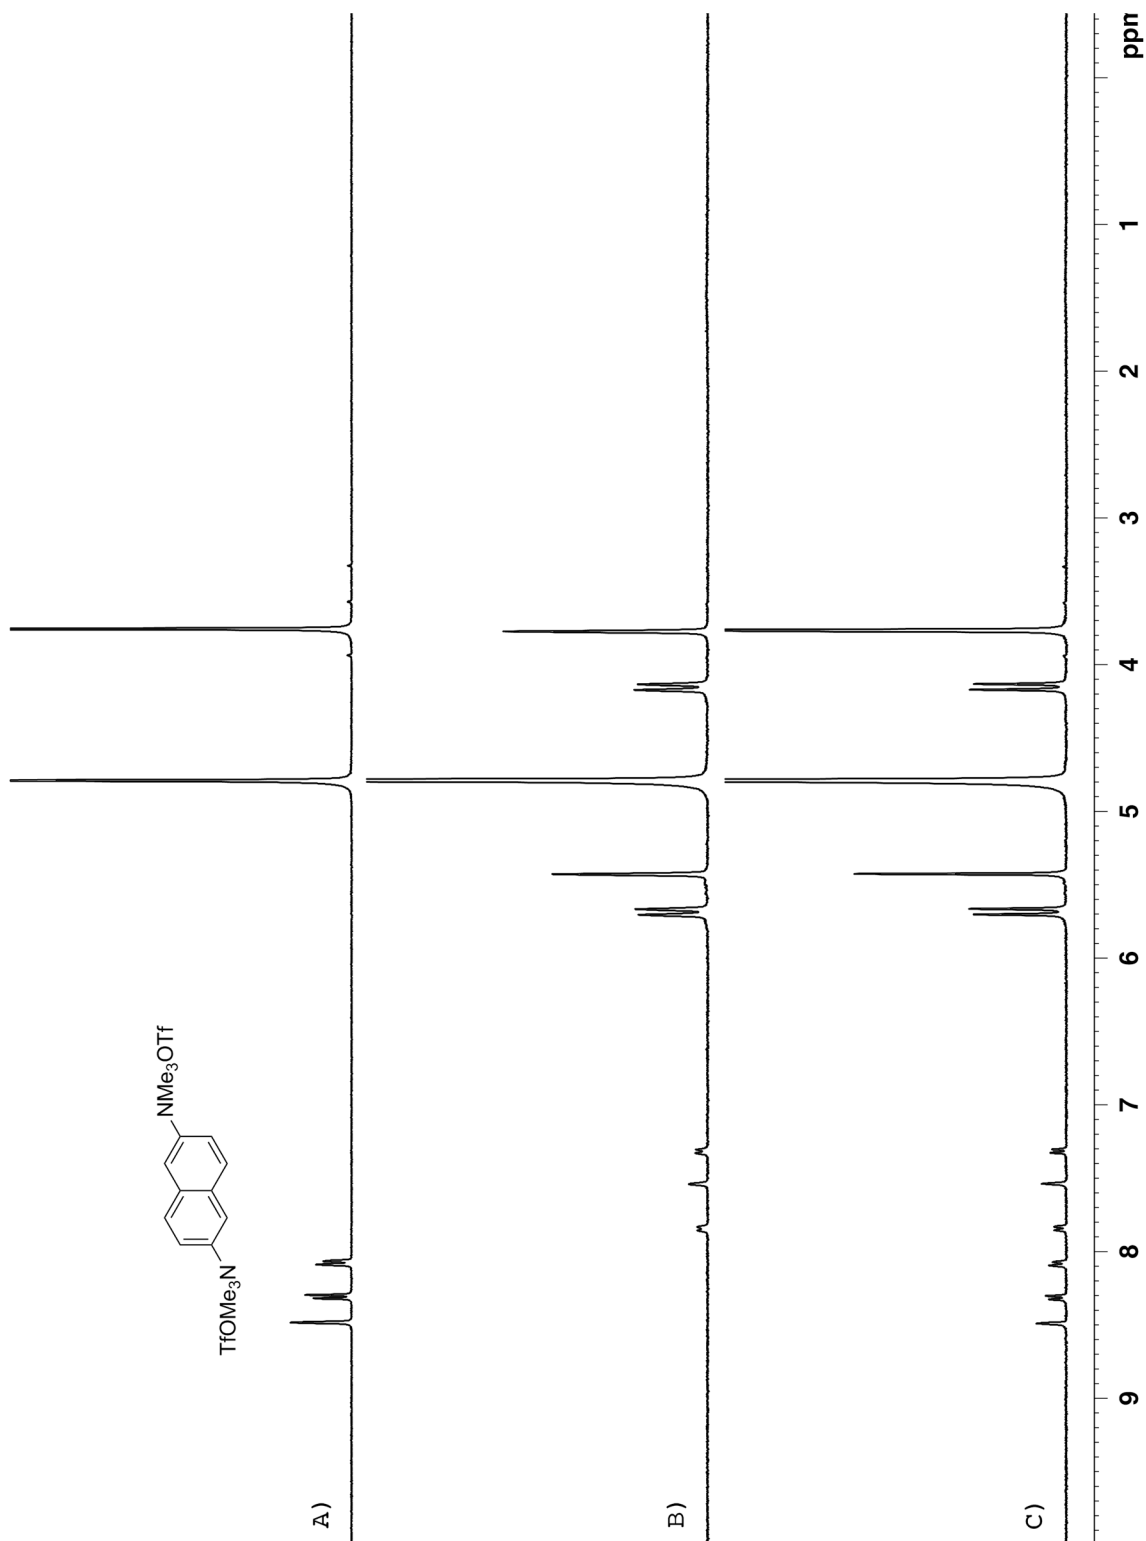

**Figure S5.**  $^1\text{H}$  NMR spectra recorded ( $\text{D}_2\text{O}$ , 400 MHz, RT) for: a) **9** (0.25 mM), b) a mixture of CB[7] (0.25 mM) and **9** (0.25 mM), and c) a mixture of CB[7] (0.25 mM) and **9** (0.5 mM).

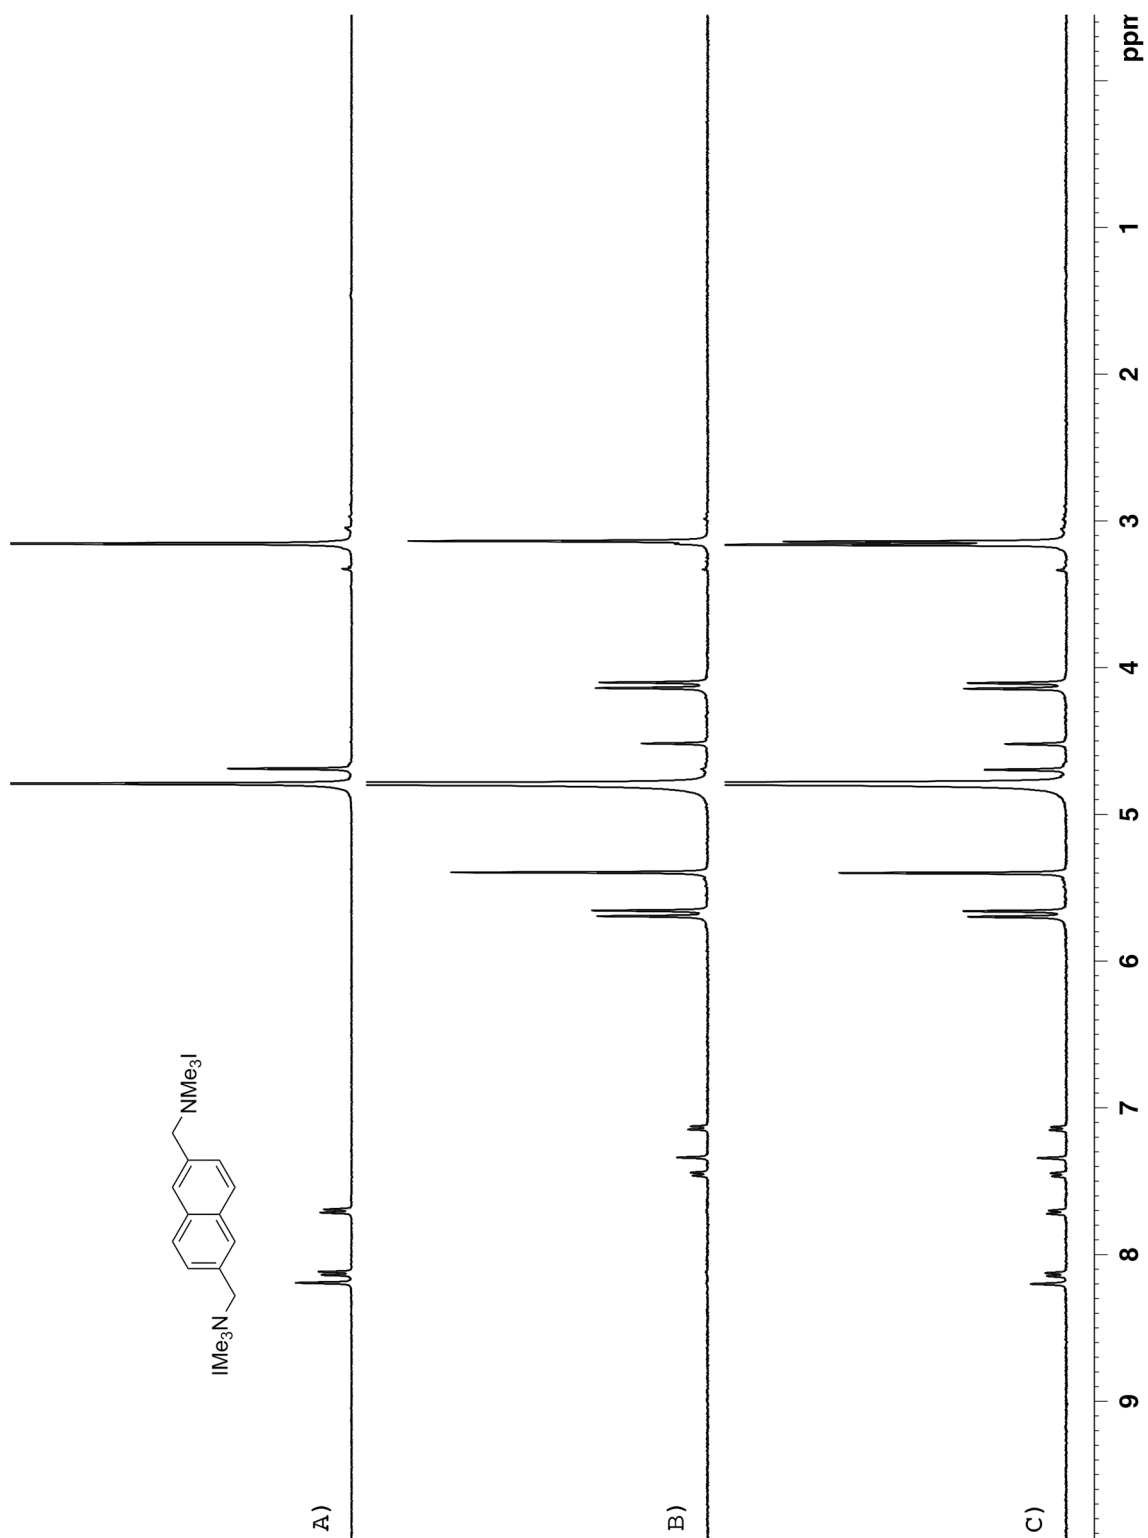

**Figure S6.**  $^1\text{H}$  NMR spectra recorded ( $\text{D}_2\text{O}$ , 400 MHz, RT) for: a) **10** (0.25 mM), b) a mixture of CB[7] (0.25 mM) and **10** (0.25 mM), and c) a mixture of CB[7] (0.25 mM) and **10** (0.5 mM).

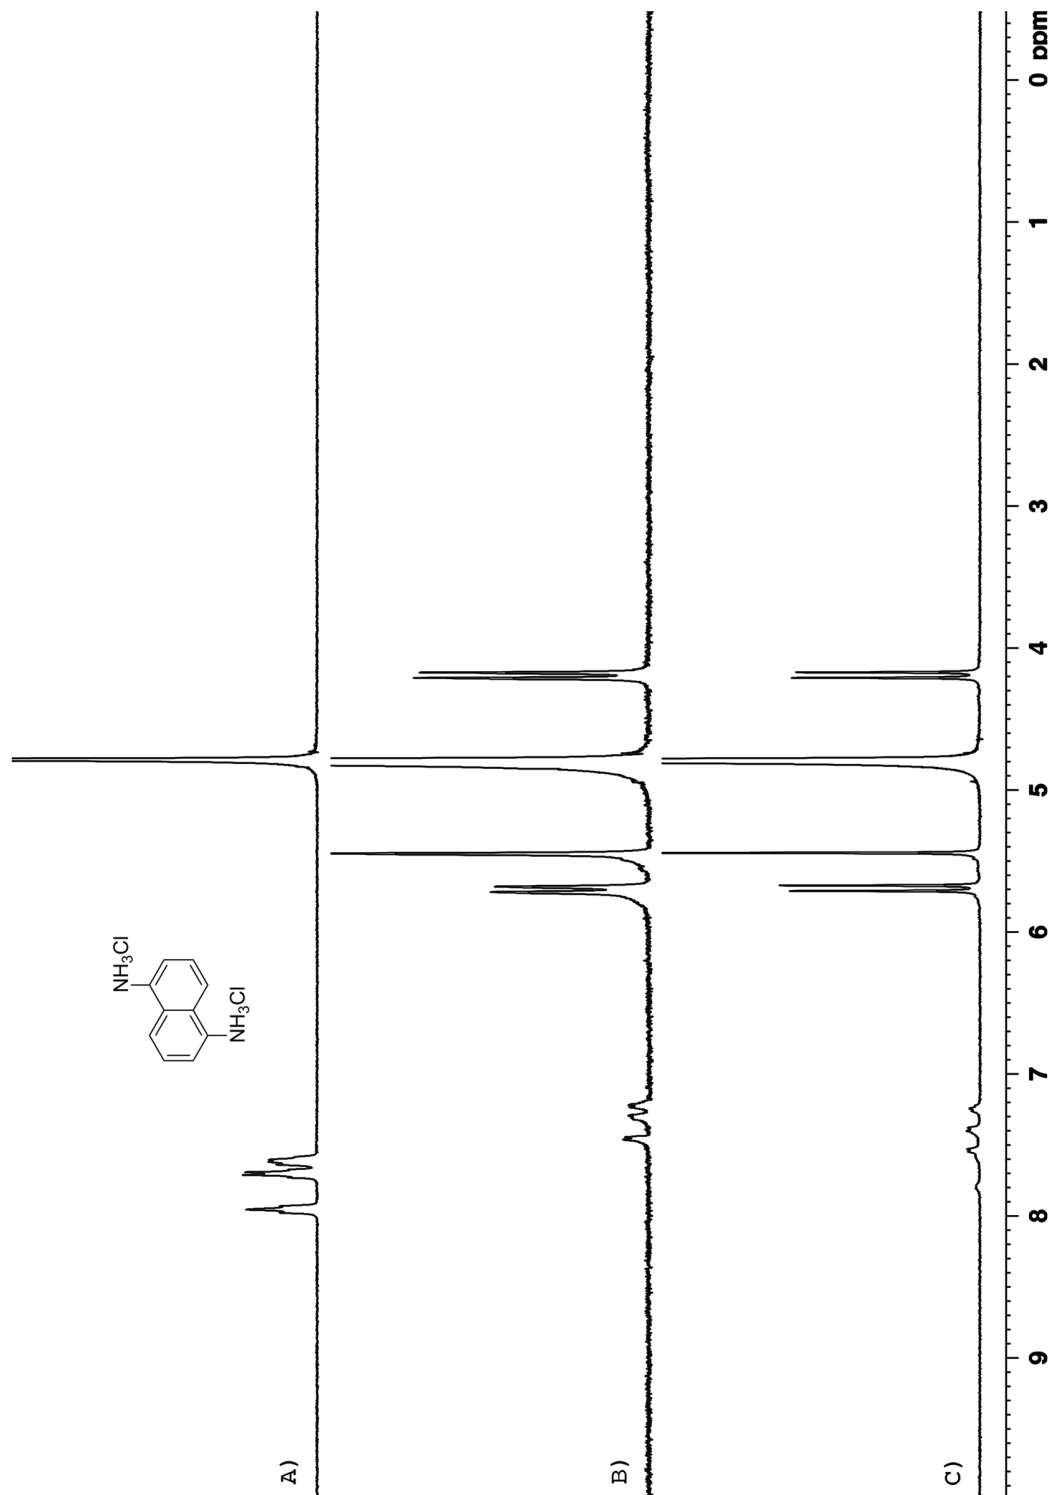

**Figure S7.**  $^1\text{H}$  NMR spectra recorded ( $\text{D}_2\text{O}$ , 400 MHz, RT) for: a) **11** (0.25 mM), b) a mixture of CB[7] (0.25 mM) and **11** (0.25 mM), and c) a mixture of CB[7] (0.25 mM) and **11** (0.5 mM).



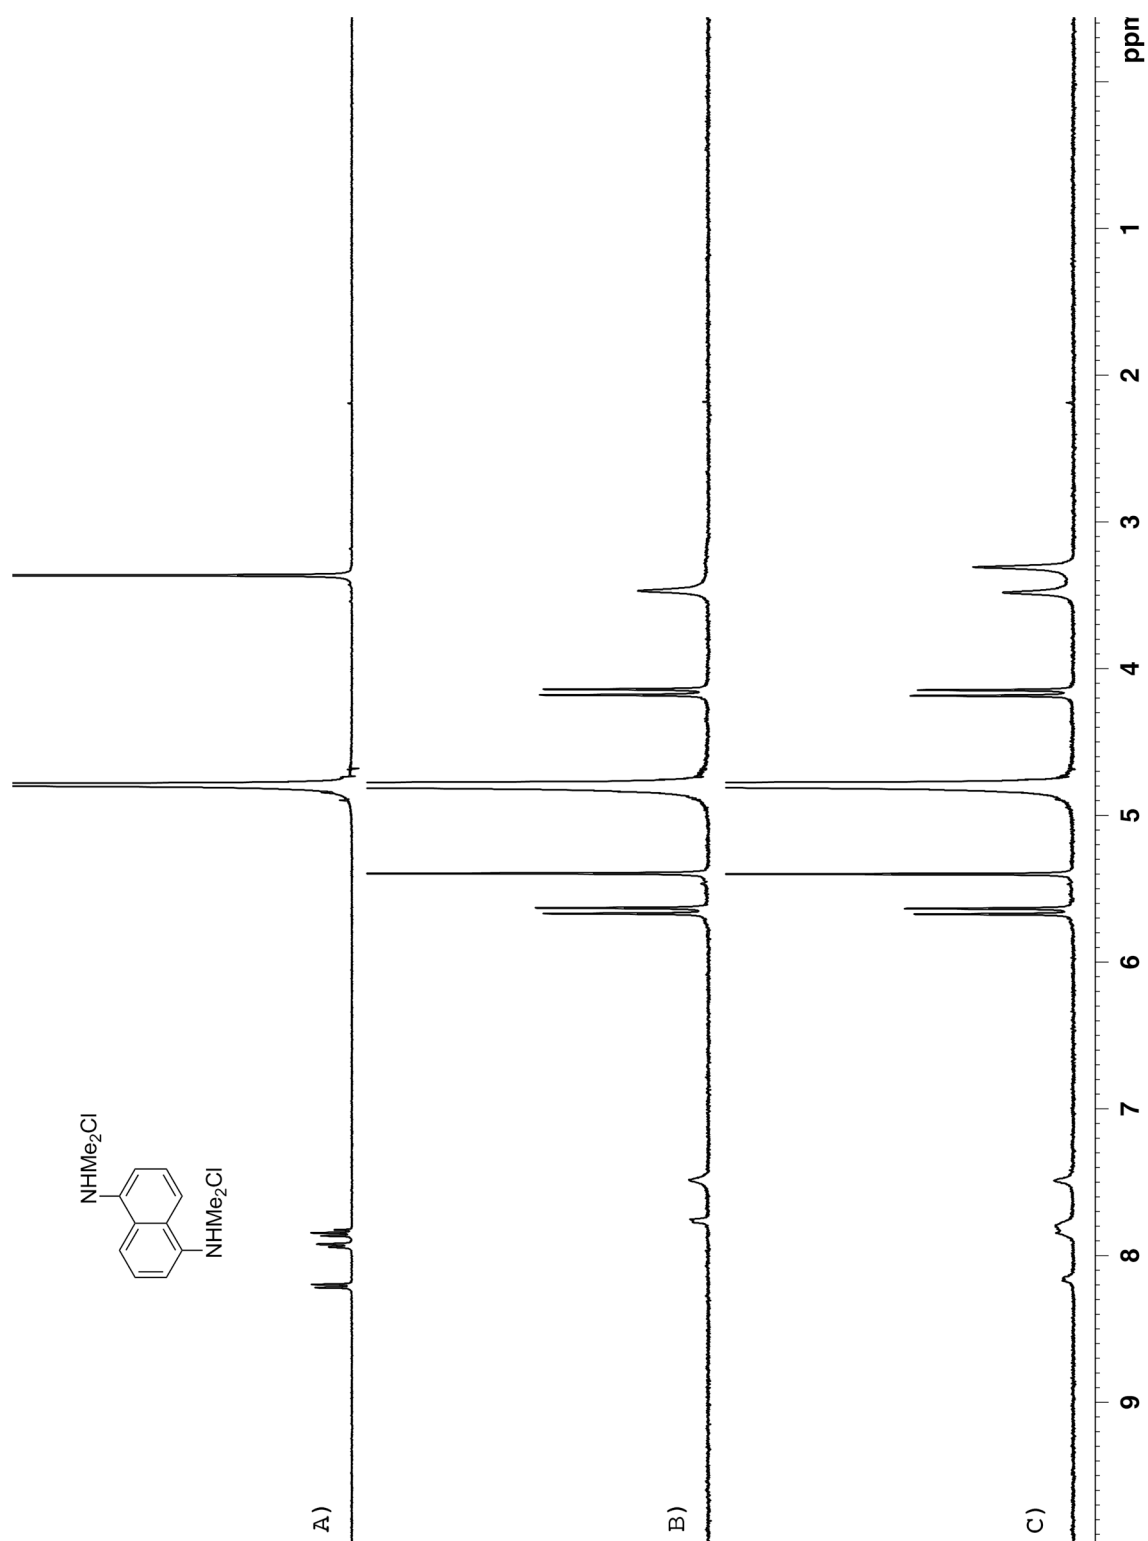

**Figure S8.**  $^1\text{H}$  NMR spectra recorded ( $\text{D}_2\text{O}$ , 400 MHz, RT) for: a) **12** (0.25 mM), b) a mixture of CB[7] (0.25 mM) and **12** (0.25 mM), and c) a mixture of CB[7] (0.25 mM) and **12** (0.5 mM).

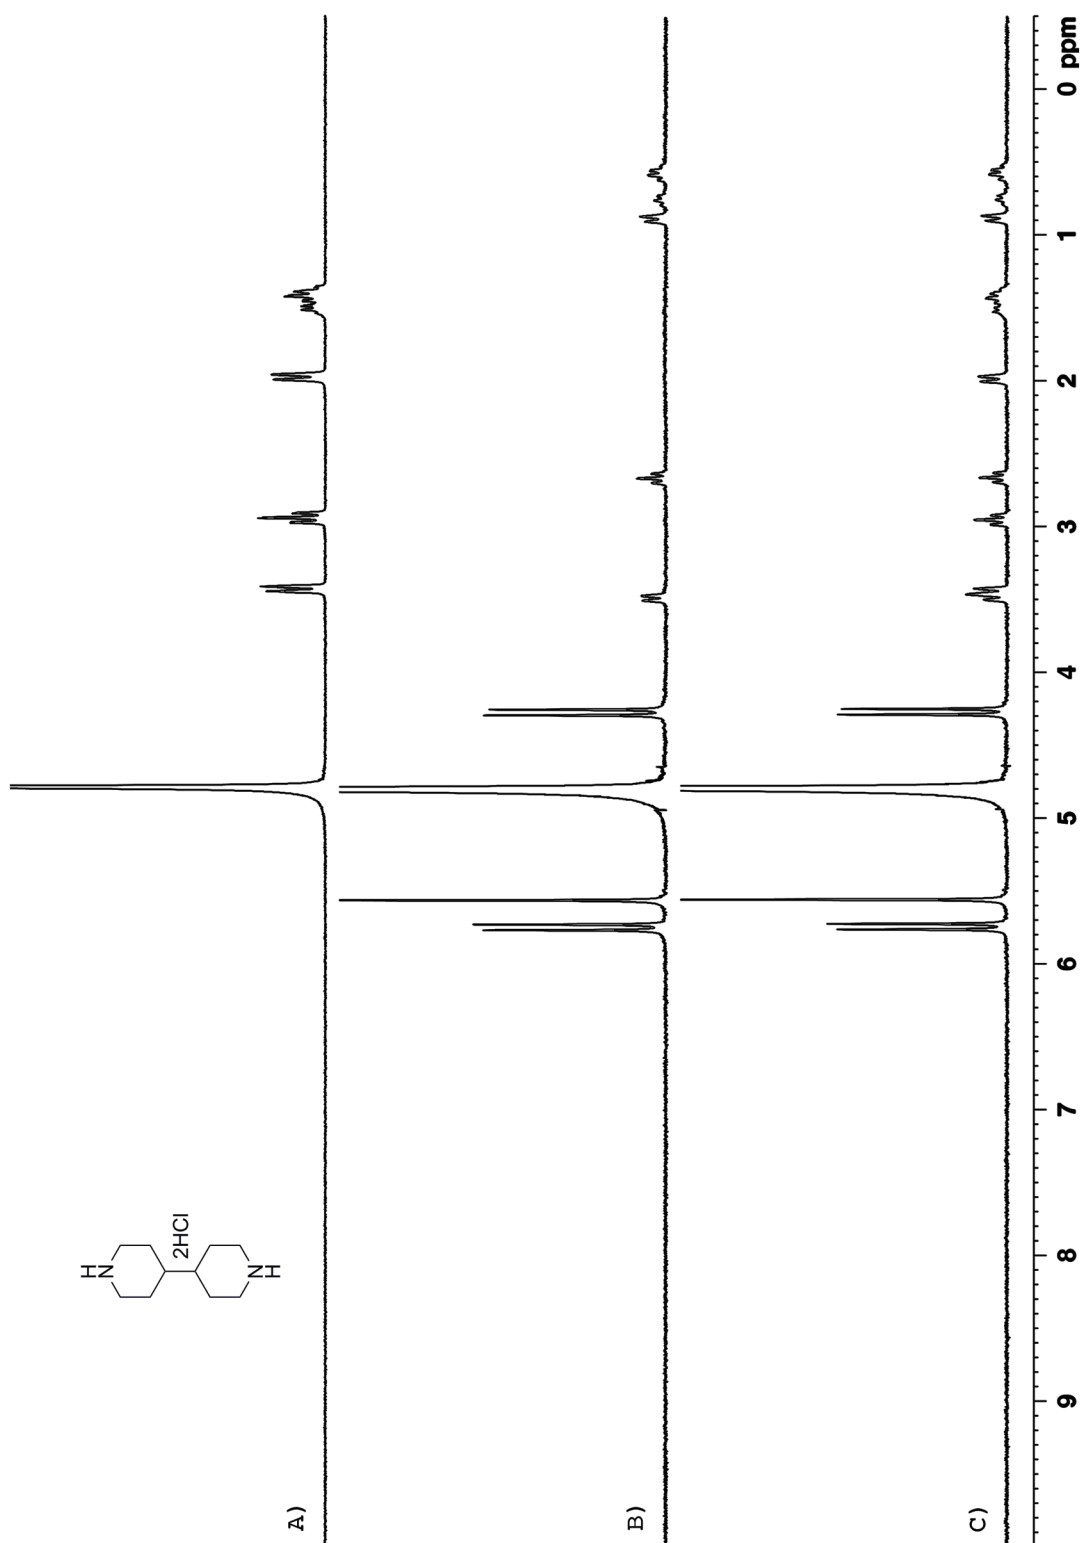

**Figure S9.**  $^1\text{H}$  NMR spectra recorded ( $\text{D}_2\text{O}$ , 400 MHz, RT) for: a) **13** (0.25 mM), b) a mixture of CB[7] (0.25 mM) and **13** (0.25 mM), and c) a mixture of CB[7] (0.25 mM) and **13** (0.5 mM).

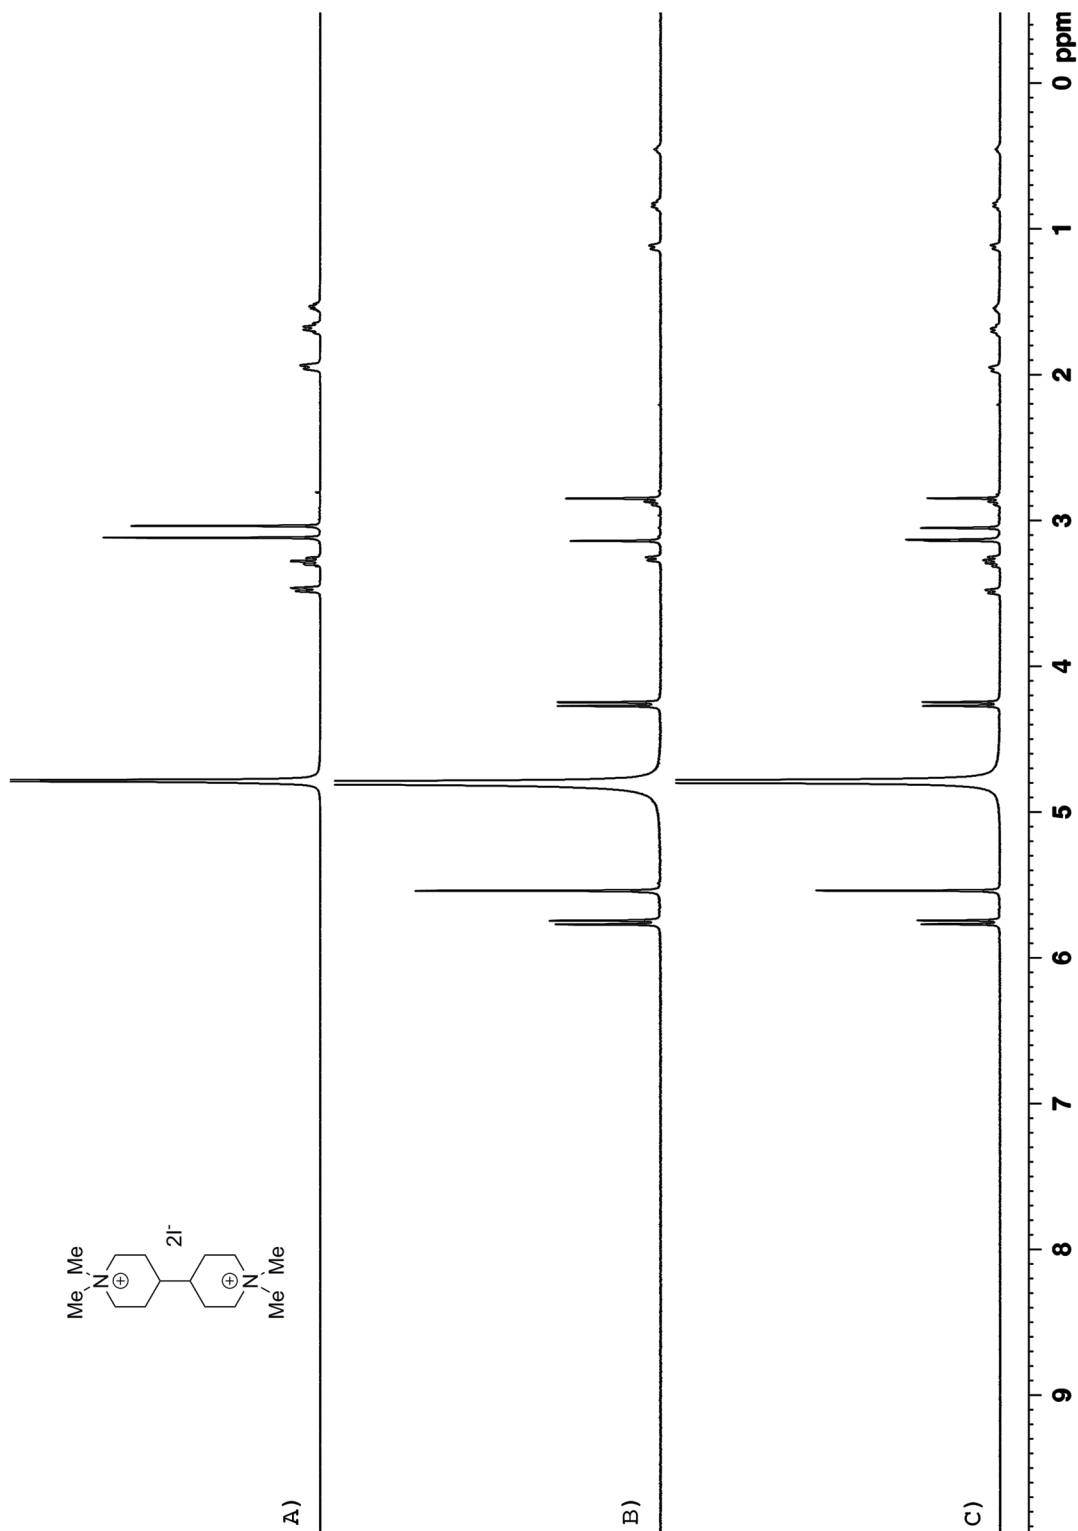

**Figure S10.** <sup>1</sup>H NMR spectra recorded (D<sub>2</sub>O, 400 MHz, RT) for: a) **14** (0.25 mM), b) a mixture of CB[7] (0.25 mM) and **14** (0.25 mM), and c) a mixture of CB[7] (0.25 mM) and **14** (0.5 mM).

### Sample Determination of $K_{rel}$ for the Competition Between **14** and **5** for CB[7]

We use equation 1 to determine  $K_{rel}$  for the interaction of **14** and **5** for CB[7]. For this purpose, we prepared a solution containing CB[7] (0.2543 mM), **14** (0.3590 mM), **5** (24.9253 mM) and allowed it to reach equilibrium (Figure S18). Next, we determined the relative concentration of CB[7]•**14** and free **14** by integration of the appropriate resonances in the  $^1\text{H}$  NMR spectrum (Figure S18: CB[7]•**14**: 5.56 ppm; CB[7]•**5**: 5.53 ppm). Using the concentration and the mass balance expression (equation 3) allowed us to calculate [CB[7]•**14**] (0.1251 mM) and [CB[7]•**5**] (0.1292 mM). Equation 2 is then used to calculate [**14**]<sub>free</sub> (0.2339 mM) using the known value of CB[7]•**14**. Lastly, equation 4 is used to calculate [**5**]<sub>free</sub> (24.7961 mM) using the known value of [CB[7]•**5**].

$$K_{rel} = ([\text{CB}[7]\cdot\mathbf{14}][\mathbf{5}]_{free}) / ([\text{CB}[7]\cdot\mathbf{5}][\mathbf{14}]_{free}) \quad (1)$$

$$[\mathbf{14}]_{Total} = 0.3590 \text{ mM} = [\mathbf{14}]_{free} + [\text{CB}[7]\cdot\mathbf{14}] \quad (2)$$

$$[\text{CB}[7]]_{Total} = 0.2543 \text{ mM} = [\text{CB}[7]\cdot\mathbf{14}] + [\text{CB}[7]\cdot\mathbf{5}] \quad (3)$$

$$[\mathbf{5}]_{Total} = 24.9253 \text{ mM} = [\mathbf{5}]_{free} + [\text{CB}[7]\cdot\mathbf{5}] \quad (4)$$

Substitution of the values of [CB[7]•**14**], [**14**]<sub>free</sub>, [CB[7]•**5**], and [**5**]<sub>free</sub> into equation 1 gave  $K_{rel} = 102.65$ . These determinations were done from independently prepared stock solutions and the average values were used in the calculations of  $K_a$  and the error analysis shown below. In preparing the solutions for the above determinations we used two methods to reach equilibrium: a) A solution of CB[7] and **14** was prepared, addition of **5** gave the final equilibrium; b) A solution of CB[7] and **5** was prepared, addition of **14** gave the final equilibrium. Under those conditions the errors in [**14**]<sub>free</sub>, [**5**]<sub>free</sub> are small and both [CB[7]•**14**] and [CB[7]•**5**] are kept in a good range for accurate measurement of their ratio by  $^1\text{H}$  NMR.

### Determination of $K_a$ for CB[7]•**14** by competition of **14** and **5** for a limiting quantity of CB[7]

We used  $^1\text{H}$  NMR competition experiments to determine  $K_{rel} = 102.65$  for these two guests. Substitution of  $K_{\text{CB}[7]\cdot\mathbf{5}} = (1.84 \pm 0.34) \times 10^9 \text{ M}^{-1}$  and  $K_{rel}$  into equation 5 gave  $K_{\text{CB}[7]\cdot\mathbf{14}} = 1.9 \times 10^{11} \text{ M}^{-1}$  (equation 6). The uncertainty in  $K_{\text{CB}[7]\cdot\mathbf{14}}$  can be determined using equation 7. Substituting  $\sigma(K_{\text{CB}[7]\cdot\mathbf{5}})/K_{\text{CB}[7]\cdot\mathbf{5}} = 0.1848$  and  $\sigma(K_{rel})/K_{rel} = 0.10$  [Note that we are using the even more conservative 10% error in this analysis] gives the percent error in  $K_{\text{CB}[7]\cdot\mathbf{14}}$  (equation 8). Substituting eq. 6 into eq. 9 gives  $\sigma(K_{\text{CB}[7]\cdot\mathbf{14}})$  (equation 9) which can be combined with eq. 6 to give a final value for  $K_{\text{CB}[7]\cdot\mathbf{14}}$  (equation 10).

$$K_{\text{CB}[7]\cdot\mathbf{14}} = (K_{\text{CB}[7]\cdot\mathbf{5}})(K_{rel}) \quad (5)$$

$$K_{\text{CB}[7]\cdot\mathbf{14}} = 1.9 \times 10^{11} \text{ M}^{-1} \quad (6)$$

$$(\sigma K_{\text{CB}[7]\cdot 14}/K_{\text{CB}[7]\cdot 14})^2 = (\sigma K_{\text{CB}[7]\cdot 5}/K_{\text{CB}[7]\cdot 5})^2 + (\sigma K_{\text{rel}}/K_{\text{rel}})^2 \quad (7)$$

$$\sigma K_{\text{CB}[7]\cdot 14}/K_{\text{CB}[7]\cdot 14} = 0.2101 \text{ (21.01\%)} \quad (8)$$

$$\sigma K_{\text{CB}[7]\cdot 14} = (0.2101) \times (1.9 \times 10^{11} \text{ M}^{-1}) = 0.4 \times 10^{11} \quad (9)$$

$$K_{\text{CB}[7]\cdot 14} = (1.9 \pm 0.4) \times 10^{11} \text{ M}^{-1} \quad (10)$$

### **Selected $^1\text{H}$ NMR spectra from the $K_a$ and $K_{\text{rel}}$ measurements**

The following spectra are representative examples of those acquired during the determination of the various  $K_a$  and  $K_{\text{rel}}$  values. The resonance at  $\approx 1.9$  ppm is due to residual H-atoms present in the  $\text{CD}_3\text{CO}_2\text{D}$  used to make the buffer. The integral is determined by deconvolution using MestRe Nova.

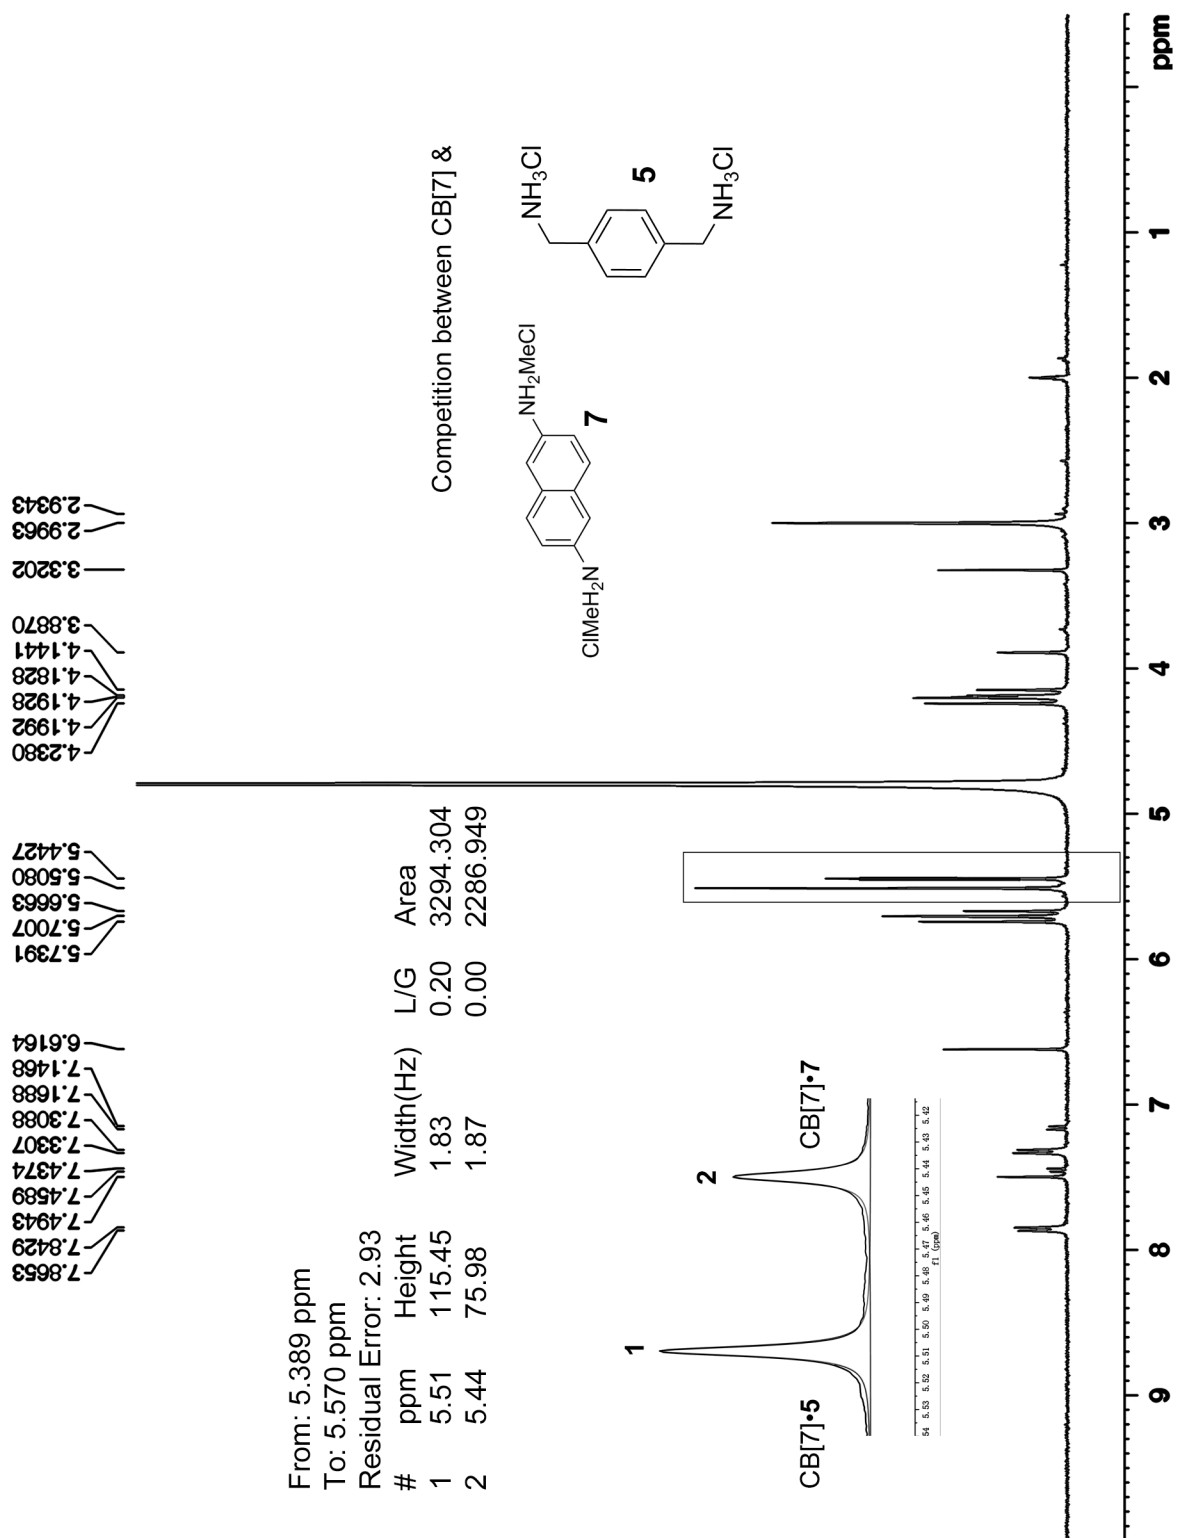

**Figure S11.** One of the  $^1\text{H}$  NMR spectra (400 MHz,  $\text{D}_2\text{O}$ , 50 mM NaOAc buffer,  $\text{pD} = 4.74$ , rt) used in the determination of  $K_{\text{rel}}$  for  $\text{CB}[7]\cdot\mathbf{7}$  and  $\text{CB}[7]\cdot\mathbf{5}$ .  $[\text{CB}[7]]_{\text{Total}} = 0.2486$  mM,  $[\mathbf{7}]_{\text{Total}} = 0.6446$  mM,  $[\mathbf{5}]_{\text{Total}} = 0.2563$  mM,  $K_{\text{rel}} = 1.40 \times 10^{-1}$ .

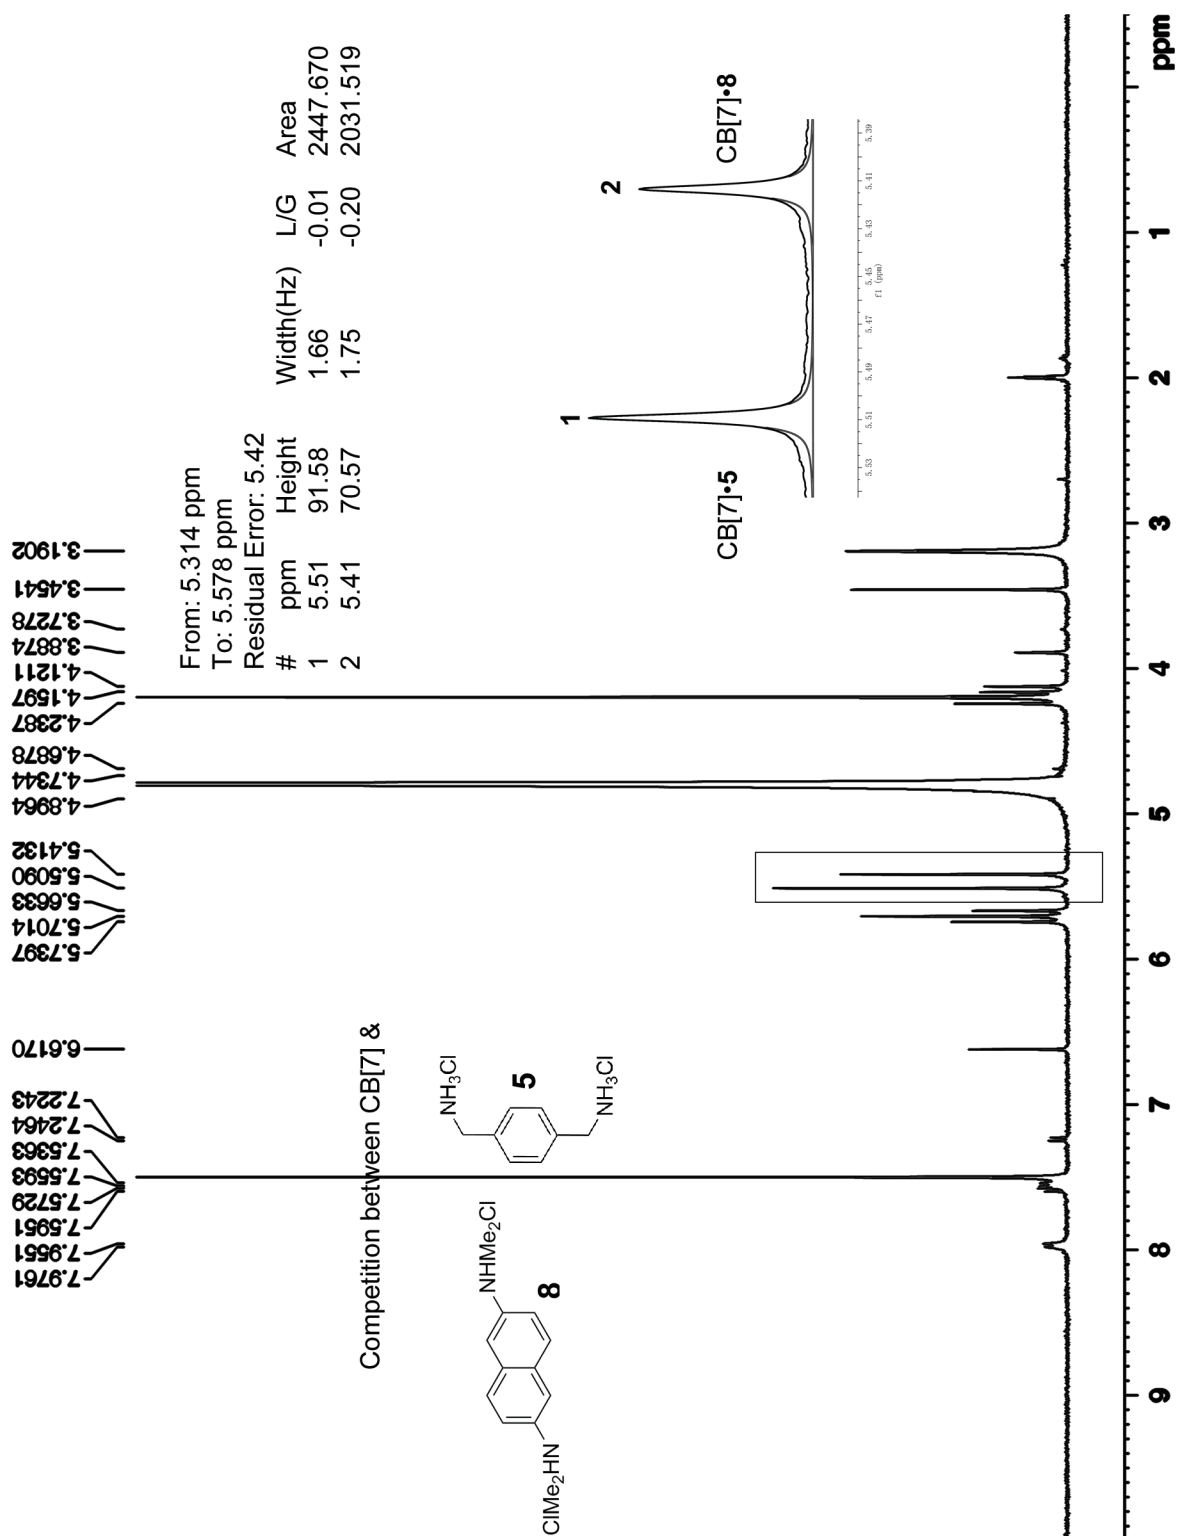

**Figure S12.** One of the  $^1\text{H}$  NMR spectra (400 MHz,  $\text{D}_2\text{O}$ , 50 mM NaOAc buffer, pD = 4.74, rt) used in the determination of  $K_{\text{rel}}$  for  $\text{CB}[7]\cdot\mathbf{8}$  and  $\text{CB}[7]\cdot\mathbf{5}$ .  $[\text{CB}[7]]_{\text{Total}} = 0.2486\text{mM}$ ,  $[\mathbf{8}]_{\text{Total}} = 0.4019\text{mM}$ ,  $[\mathbf{5}]_{\text{Total}} = 0.5980\text{mM}$ ,  $K_{\text{rel}} = 1.33$ .

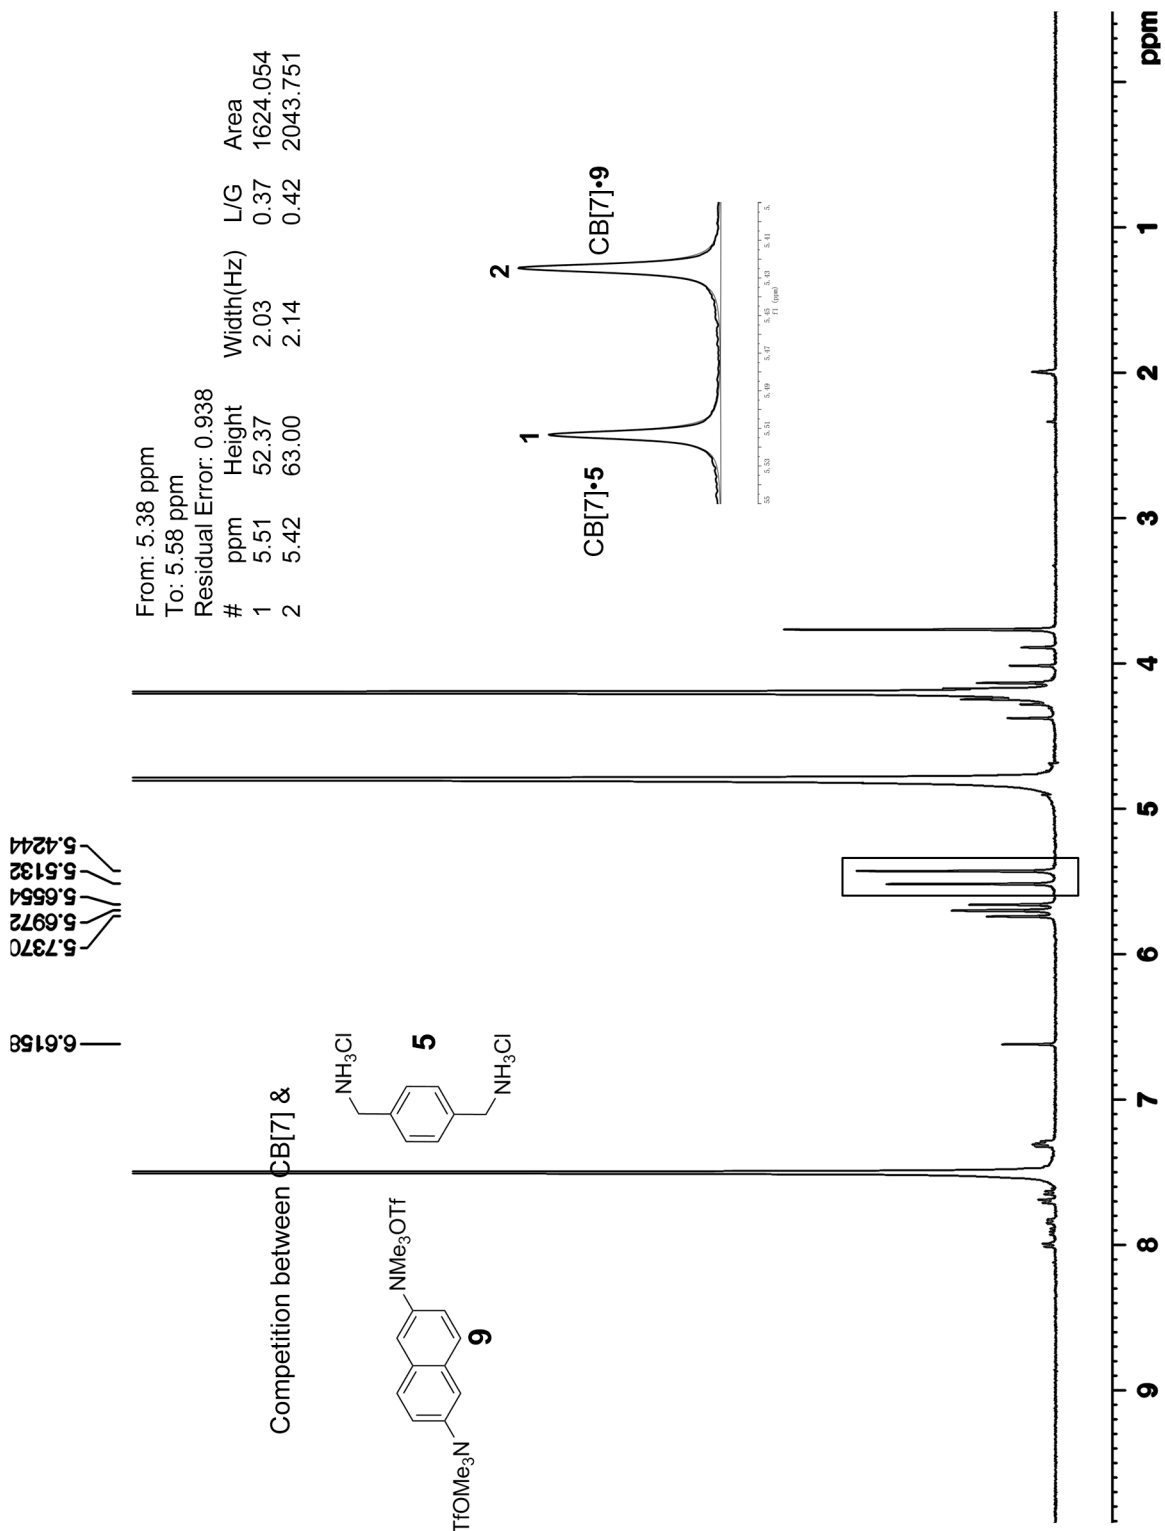

**Figure S13.** One of the  $^1\text{H}$  NMR spectra (400 MHz,  $\text{D}_2\text{O}$ , 50 mM NaOAc buffer,  $\text{pD} = 4.74$ , rt) used in the determination of  $K_{\text{rel}}$  for  $\text{CB}[7]\cdot\mathbf{9}$  and  $\text{CB}[7]\cdot\mathbf{5}$ .  $[\text{CB}[7]]_{\text{Total}} = 0.2312$  mM,  $[\mathbf{9}]_{\text{Total}} = 0.2612$  mM,  $[\mathbf{5}]_{\text{Total}} = 9.7852$  mM,  $K_{\text{rel}} = 91.99$ .



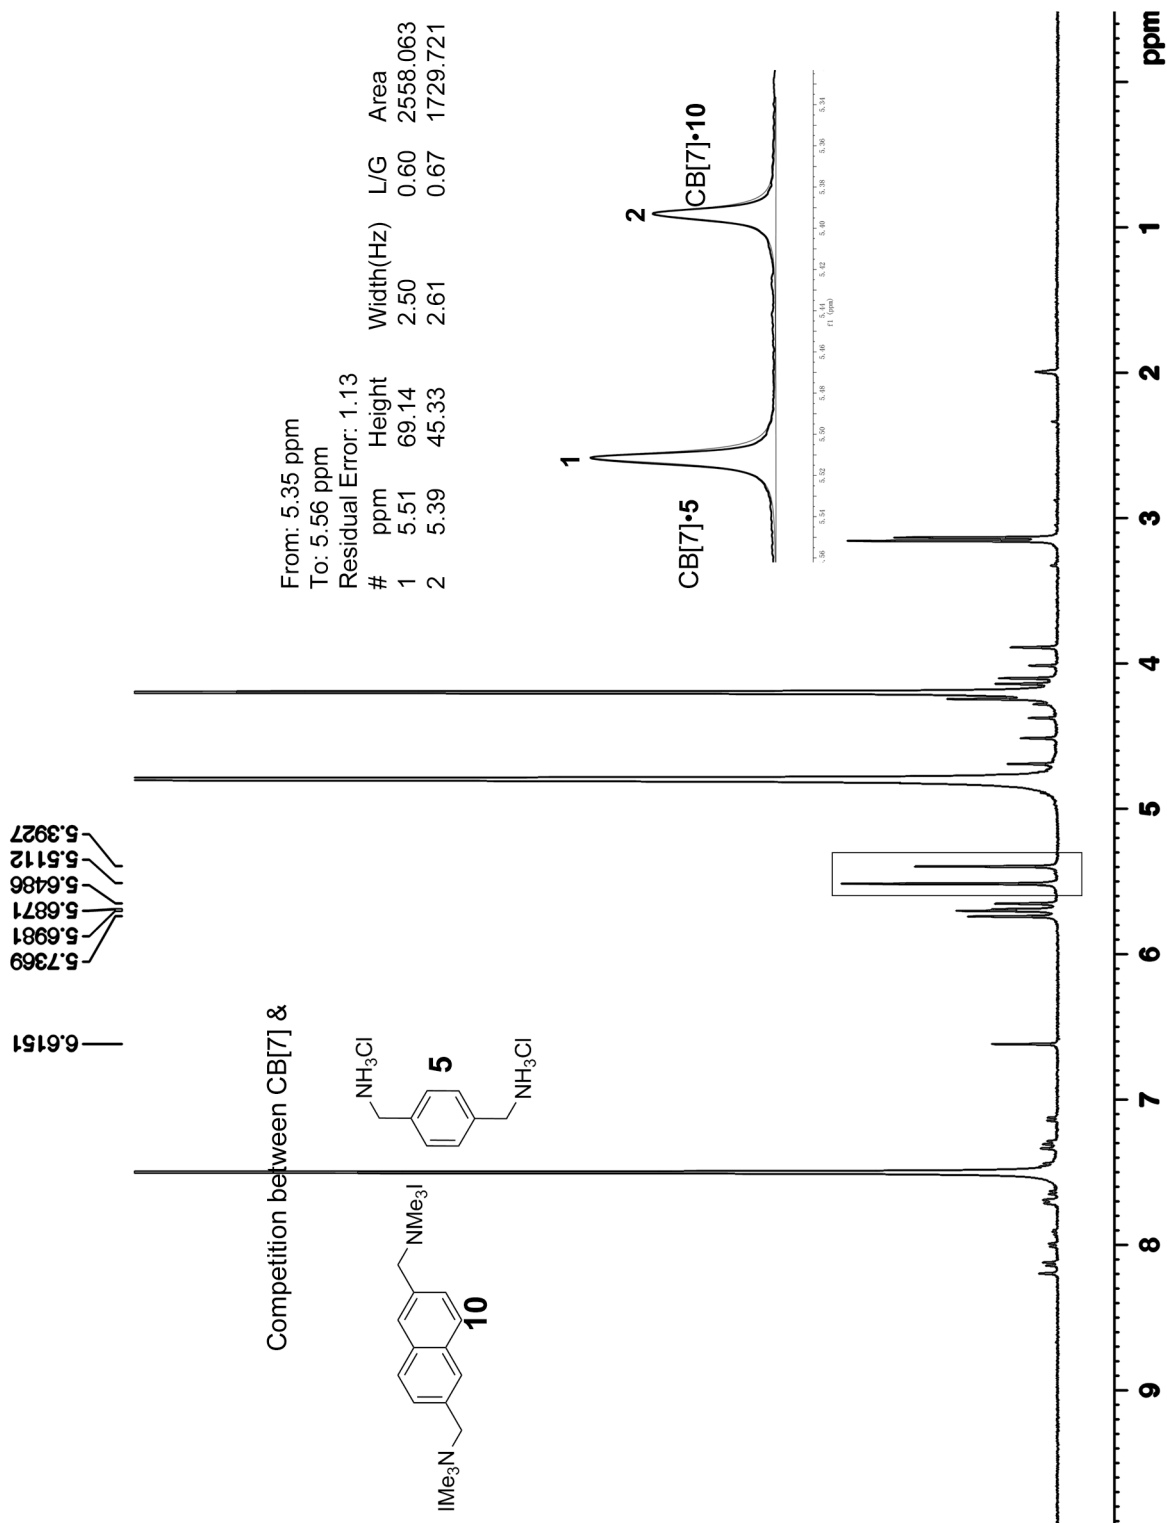

**Figure S14.** One of the  $^1\text{H}$  NMR spectra (400 MHz,  $\text{D}_2\text{O}$ , 50 mM NaOAc buffer, pD = 4.74, rt) used in the determination of  $K_{\text{rel}}$  for CB[7]•**10** and CB[7]•**5**.  $[\text{CB}[7]]_{\text{Total}} = 0.2543$  mM,  $[\mathbf{10}]_{\text{Total}} = 0.4181$  mM,  $[\mathbf{5}]_{\text{Total}} = 6.8069$  mM,  $K_{\text{rel}} = 14.25$ .

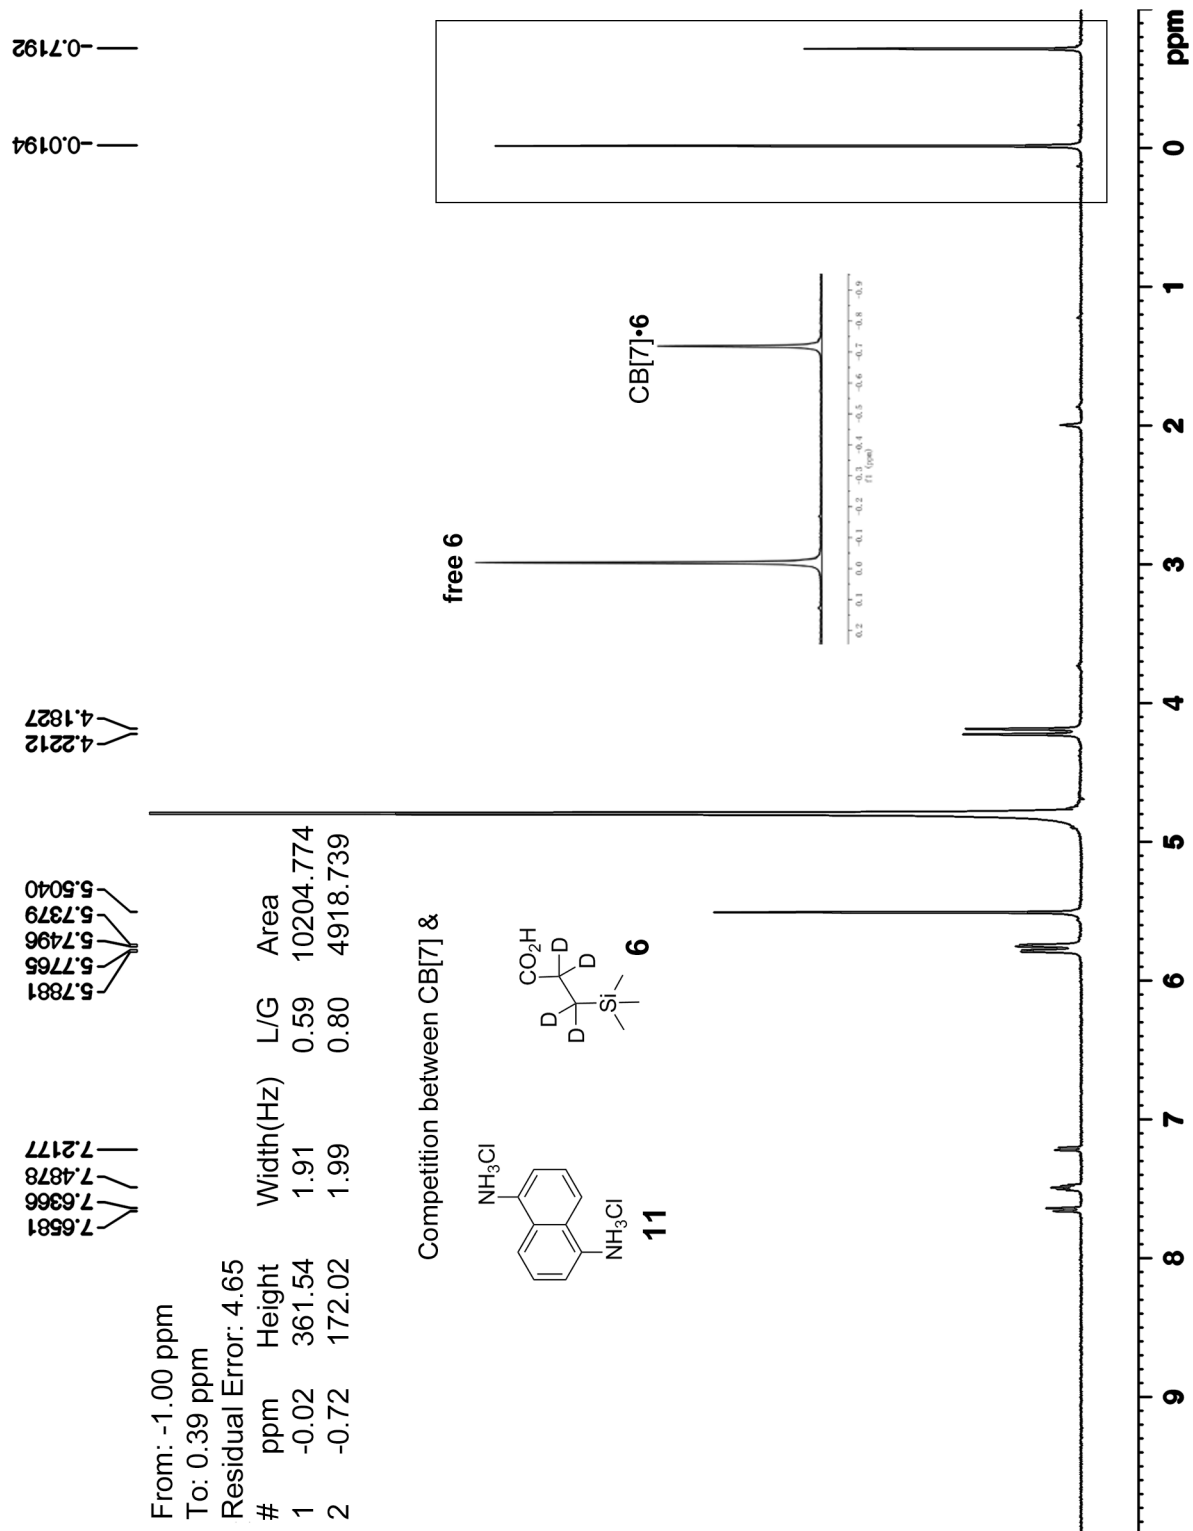

**Figure S15.** One of the  $^1\text{H}$  NMR spectra (400 MHz,  $\text{D}_2\text{O}$ , 50 mM NaOAc buffer, pD = 4.74, rt) used in the determination of  $K_{\text{rel}}$  for  $\text{CB}[7]\cdot\mathbf{11}$  and  $\text{CB}[7]\cdot\mathbf{6}$ .  $[\text{CB}[7]]_{\text{Total}} = 0.2486$  mM,  $[\mathbf{11}]_{\text{Total}} = 0.9113$  mM,  $[\mathbf{6}]_{\text{Total}} = 0.3720$  mM,  $K_{\text{rel}} = 3.38 \times 10^{-1}$ .

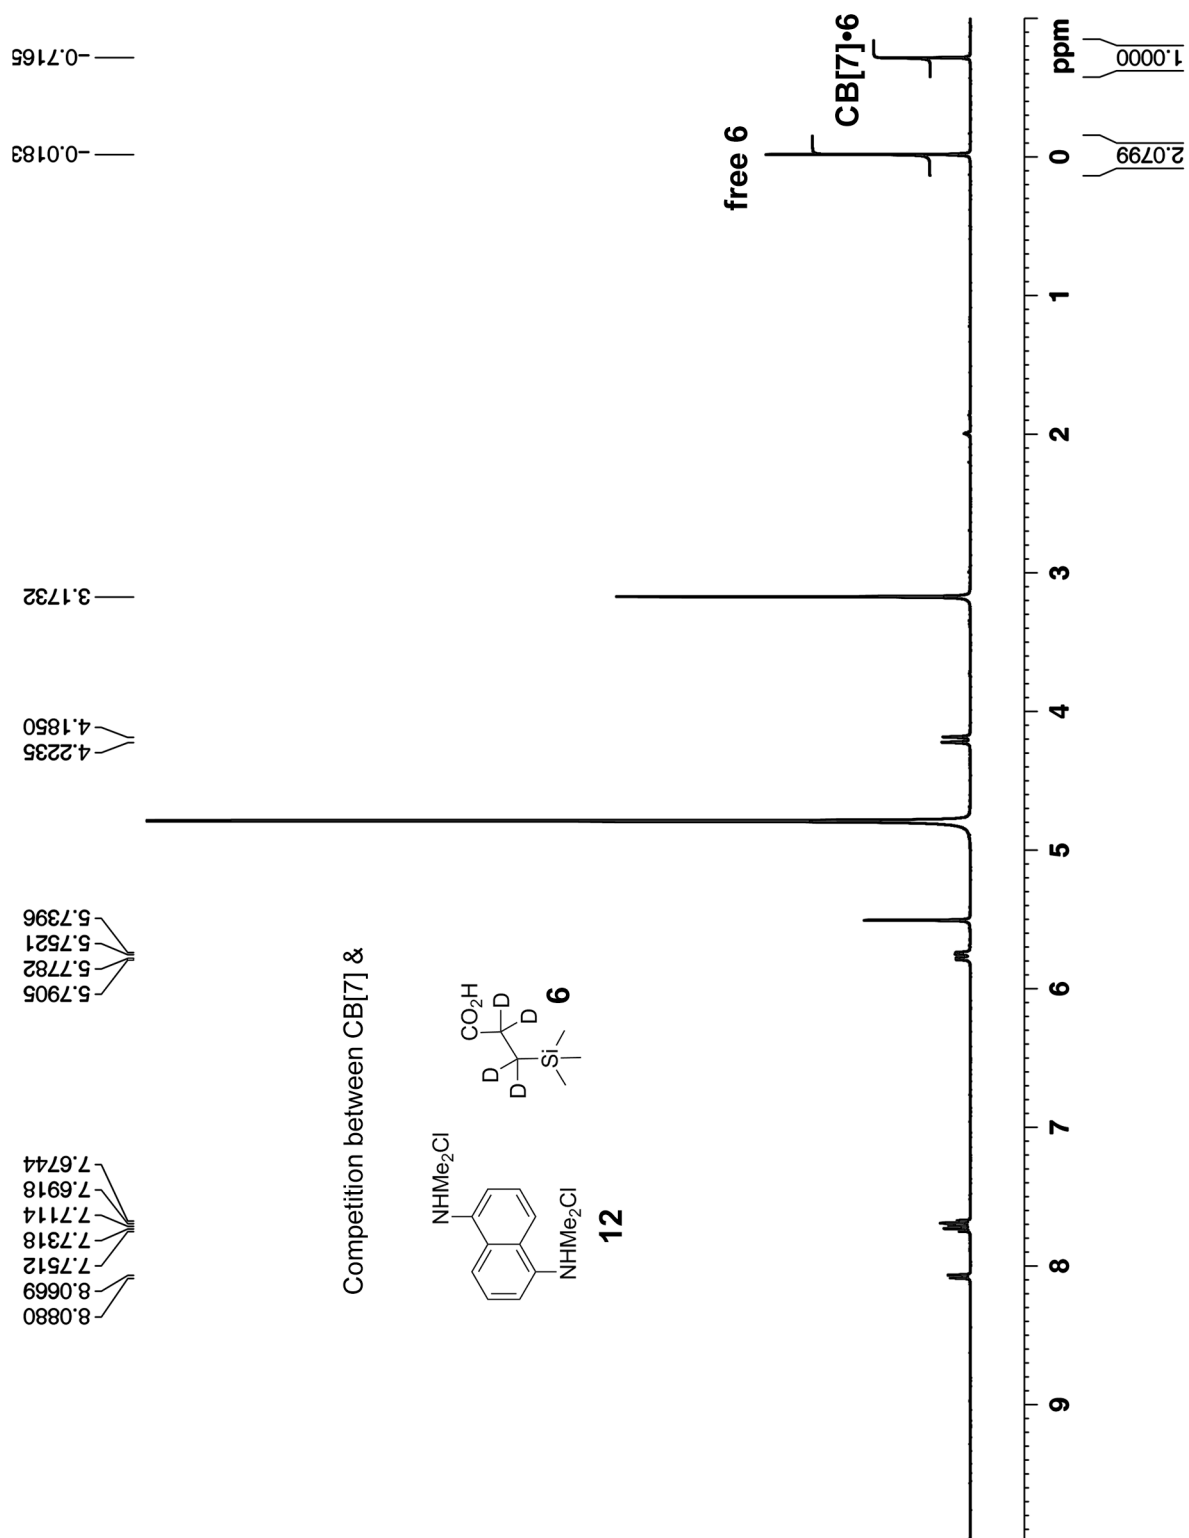

**Figure S16.** One of the  $^1\text{H}$  NMR spectra (400 MHz,  $\text{D}_2\text{O}$ , 50 mM NaOAc buffer,  $\text{pD} = 4.74$ , rt) used in the determination of  $K_{\text{rel}}$  for  $\text{CB}[7]\cdot\mathbf{12}$  and  $\text{CB}[7]\cdot\mathbf{6}$ .  $[\text{CB}[7]]_{\text{Total}} = 0.2543$  mM,  $[\mathbf{12}]_{\text{Total}} = 0.8998$  mM,  $[\mathbf{6}]_{\text{Total}} = 0.3720$  mM,  $K_{\text{rel}} = 3.62 \times 10^{-1}$ .

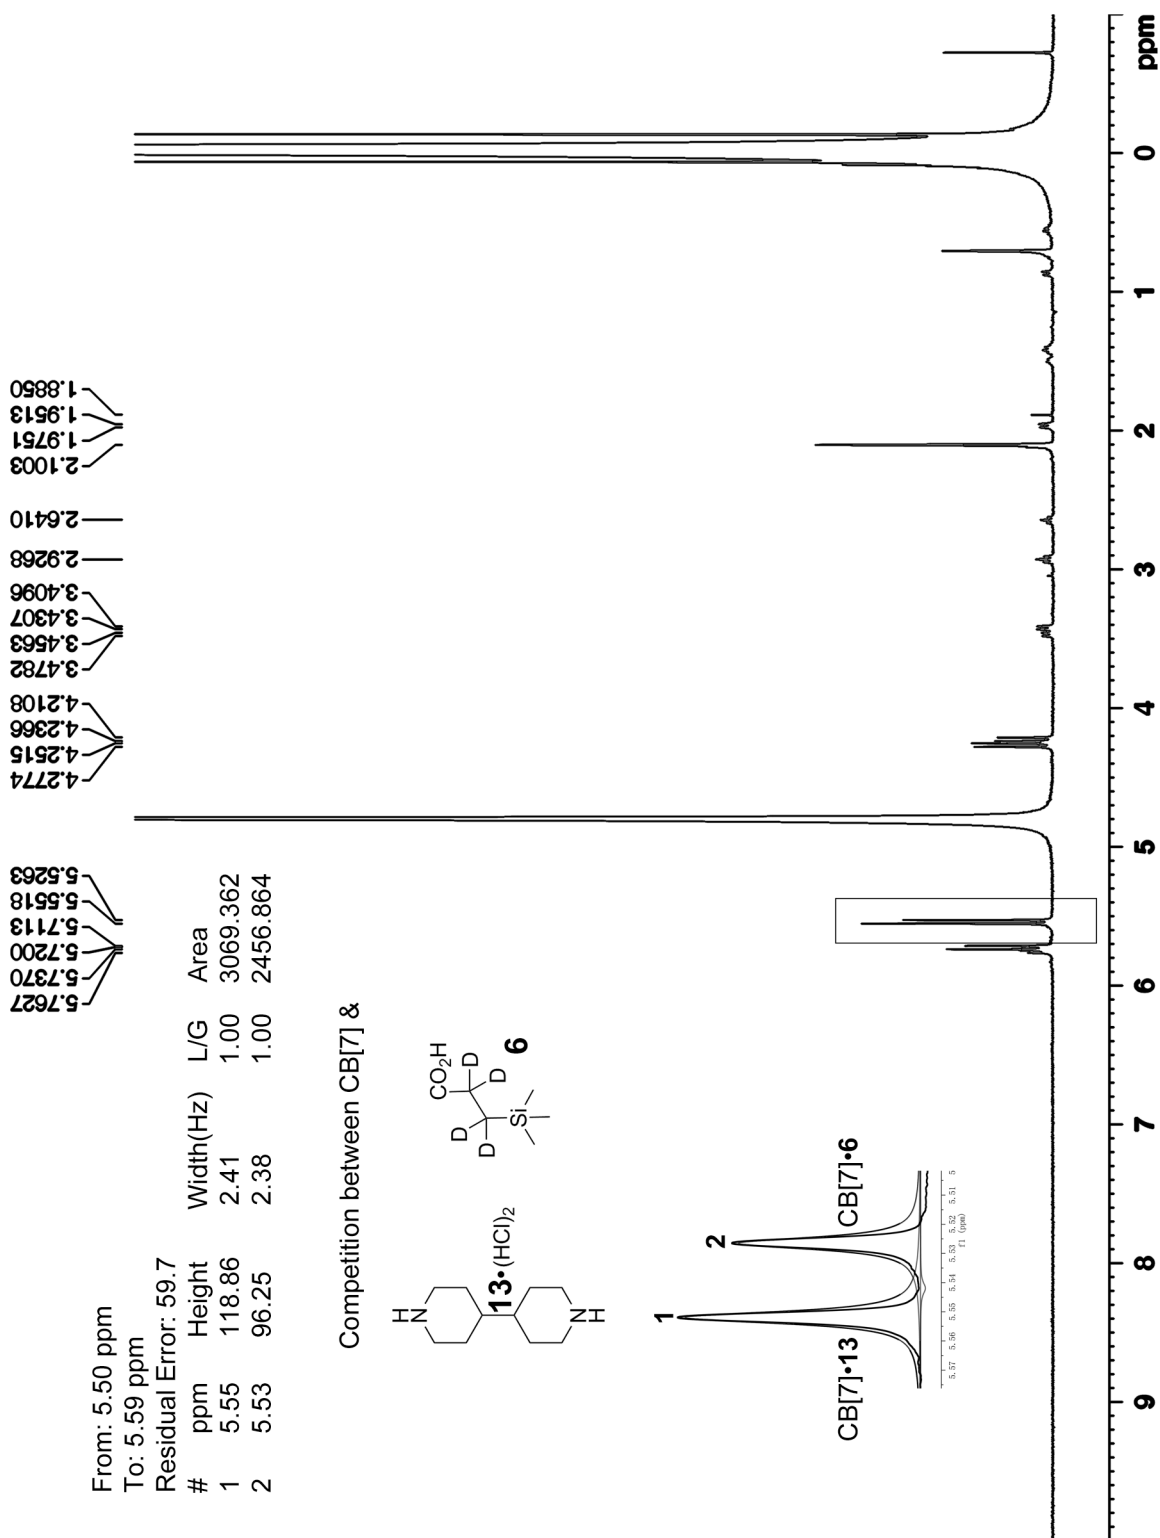

**Figure S17.** One of the  $^1\text{H}$  NMR spectra (600 MHz,  $\text{D}_2\text{O}$ , 50 mM NaOAc buffer, pD = 4.74, rt) used in the determination of  $K_{\text{rel}}$  for  $\text{CB}[7]\cdot\mathbf{13}$  and  $\text{CB}[7]\cdot\mathbf{6}$ .  $[\text{CB}[7]]_{\text{Total}} = 0.2543$  mM,  $[\mathbf{13}]_{\text{Total}} = 0.3570$  mM,  $[\mathbf{6}]_{\text{Total}} = 134.8447$  mM,  $K_{\text{rel}} = 779.45$ .

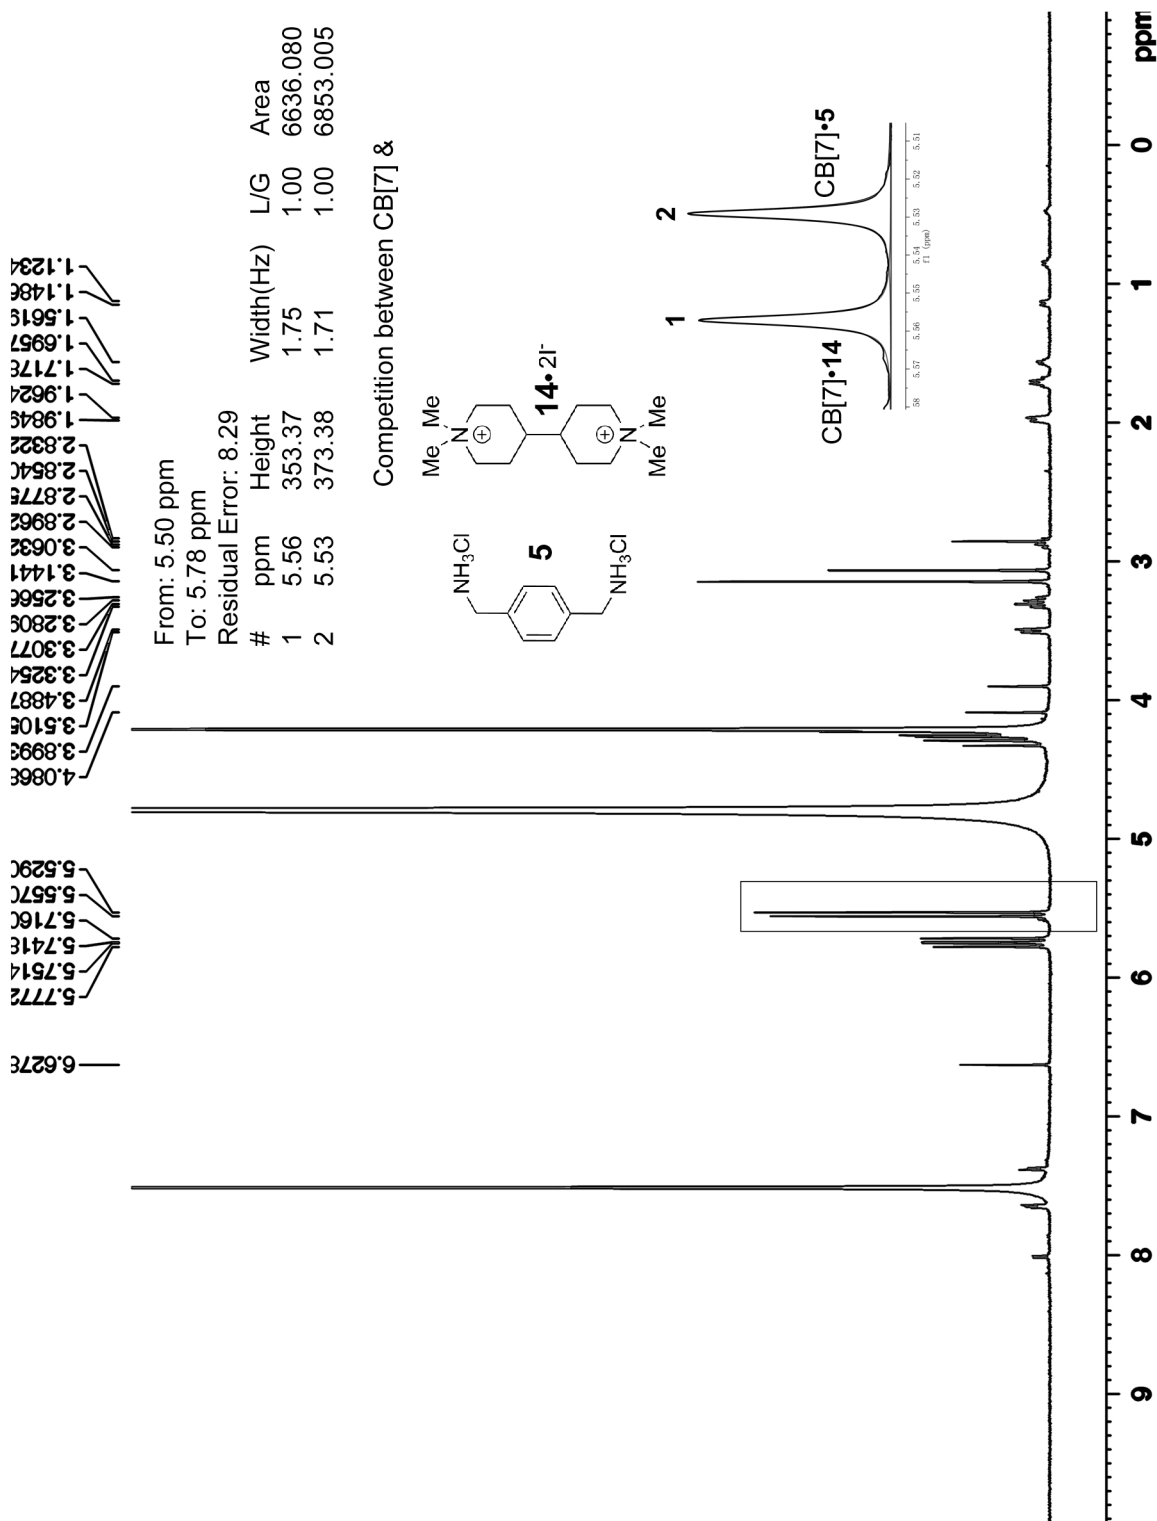

**Figure S18.** One of the  $^1\text{H}$  NMR spectra (600 MHz,  $\text{D}_2\text{O}$ , 50 mM NaOAc buffer, pD = 4.74, rt) used in the determination of  $K_{\text{rel}}$  for  $\text{CB}[7]\cdot\mathbf{14}$  and  $\text{CB}[7]\cdot\mathbf{5}$ .  $[\text{CB}[7]]_{\text{Total}} = 0.2543$  mM,  $[\mathbf{14}]_{\text{Total}} = 0.3590$  mM,  $[\mathbf{5}]_{\text{Total}} = 24.9253$  mM,  $K_{\text{rel}} = 102.65$

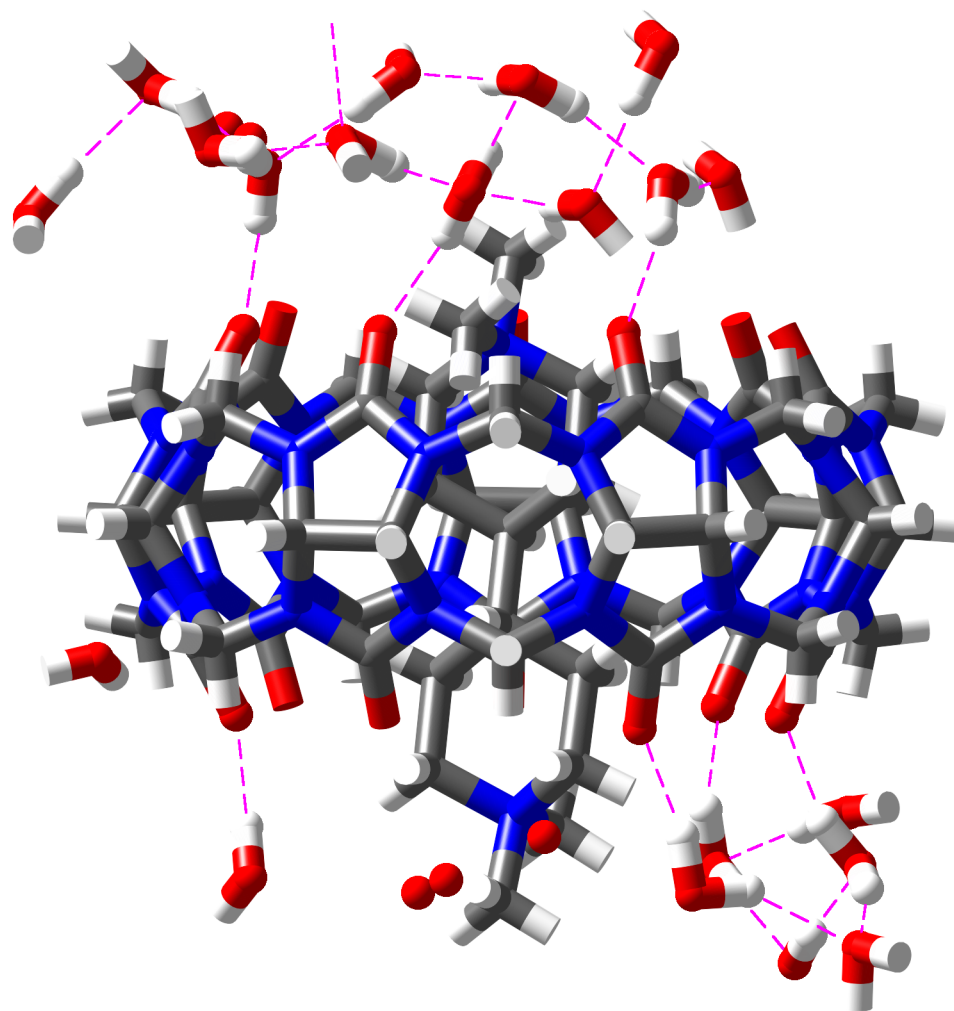

**Figure S19.** Illustration of the solvating H<sub>2</sub>O molecules well ordered around the ureidyl C=O groups from the structure of CB[7]•14.

Coordinates of the minimized geometry of CB[7]•**1b**.

E: -2994513.11649975 kcal/mol

|   |              |              |             |
|---|--------------|--------------|-------------|
| N | 1.957286589  | 6.799696985  | 9.054726290 |
| C | 1.440571357  | 8.166743555  | 8.939254611 |
| H | 0.731770285  | 8.375574803  | 9.768277989 |
| N | 2.444340737  | 9.222446739  | 8.852886756 |
| C | 1.629648532  | 6.010253583  | 7.951921149 |
| O | 1.854795438  | 4.803727951  | 7.829881308 |
| C | 2.458969676  | 9.857390681  | 7.608512229 |
| O | 3.153473619  | 10.821365521 | 7.291965216 |
| N | 0.970751958  | 6.818037516  | 7.025894852 |
| C | 0.769183271  | 8.183314049  | 7.513949778 |
| H | -0.314947581 | 8.423652930  | 7.535134416 |
| N | 1.505961214  | 9.226254765  | 6.804027461 |
| C | 0.305952004  | 6.269175630  | 5.849424224 |
| H | 0.317901021  | 5.169414222  | 5.951371409 |
| H | -0.742975249 | 6.633438668  | 5.830819724 |
| C | 1.092577755  | 9.778505018  | 5.521353090 |
| H | 1.575996601  | 10.767116691 | 5.424741369 |
| H | -0.011898729 | 9.897074233  | 5.517914368 |
| N | 0.940149543  | 6.586204930  | 4.575476128 |
| C | 0.733934373  | 7.847417166  | 3.859395363 |
| H | -0.349762272 | 8.087504761  | 3.816840108 |
| N | 1.486065180  | 8.995443052  | 4.358094862 |
| C | 1.533088617  | 5.606582336  | 3.776257356 |
| O | 1.715776805  | 4.428121201  | 4.088050498 |
| C | 2.439438714  | 9.455602344  | 3.444013729 |
| O | 3.145130422  | 10.453987932 | 3.572018523 |
| N | 1.849429713  | 6.193600589  | 2.549708613 |
| C | 1.375041184  | 7.574855248  | 2.447388978 |
| H | 0.654972673  | 7.667081926  | 1.606560786 |
| N | 2.410117182  | 8.599916299  | 2.339860864 |
| C | 2.314343060  | 5.416161051  | 1.407452407 |
| H | 1.660493141  | 5.630782711  | 0.535954643 |
| H | 2.229843216  | 4.349945011  | 1.683197243 |
| C | 3.109968581  | 8.917339455  | 1.102014012 |
| H | 3.498158273  | 9.946507014  | 1.204144840 |
| H | 2.388481395  | 8.868154794  | 0.258856955 |
| N | 3.701838422  | 5.652810824  | 1.024641588 |
| C | 4.135140525  | 6.753786162  | 0.160920006 |

|   |              |             |              |
|---|--------------|-------------|--------------|
| H | 3.476640899  | 6.817547849 | -0.731377388 |
| N | 4.248205181  | 8.061655277 | 0.800802383  |
| C | 4.690719106  | 4.682375451 | 1.188407643  |
| O | 4.558388392  | 3.603093573 | 1.768491713  |
| C | 5.562814348  | 8.535683647 | 0.836513831  |
| O | 5.926769176  | 9.641217539 | 1.232659338  |
| N | 5.844487274  | 5.132505844 | 0.546801397  |
| C | 5.628419370  | 6.385321149 | -0.181437129 |
| H | 5.810767878  | 6.230071443 | -1.266119177 |
| N | 6.381597414  | 7.540288145 | 0.297129791  |
| C | 7.009242797  | 4.274871984 | 0.361227737  |
| H | 6.722261230  | 3.259710003 | 0.688263211  |
| H | 7.274292503  | 4.258528934 | -0.717044260 |
| C | 7.788175290  | 7.770221240 | 0.000307771  |
| H | 7.974081403  | 8.851432681 | 0.129807942  |
| H | 7.986391887  | 7.476909104 | -1.052318818 |
| N | 8.187567651  | 4.662441194 | 1.127610260  |
| C | 9.136194455  | 5.682751960 | 0.676477194  |
| H | 9.403858810  | 5.507483420 | -0.387232877 |
| N | 8.723800127  | 7.070461421 | 0.870170218  |
| C | 8.684744232  | 3.893964997 | 2.182801985  |
| O | 8.138365541  | 2.909163813 | 2.685043422  |
| C | 9.529471649  | 7.750297087 | 1.787153481  |
| O | 9.463887625  | 8.945699569 | 2.066751120  |
| N | 9.926356236  | 4.422575727 | 2.543845297  |
| C | 10.347912374 | 5.517872391 | 1.667085673  |
| H | 11.301778912 | 5.253428519 | 1.163090263  |
| N | 10.455503149 | 6.833123677 | 2.292749287  |
| C | 10.833421260 | 3.737652641 | 3.458754019  |
| H | 10.403684015 | 2.741324489 | 3.664879936  |
| H | 11.820016034 | 3.622414650 | 2.961926050  |
| C | 11.581869140 | 7.249966786 | 3.115463654  |
| H | 11.585367949 | 8.354688493 | 3.121666896  |
| H | 12.521951036 | 6.872802251 | 2.659323611  |
| N | 11.026844645 | 4.397324255 | 4.744381058  |
| C | 11.965876464 | 5.499849537 | 4.959749456  |
| H | 12.952151495 | 5.251215227 | 4.513022975  |
| N | 11.522729263 | 6.814662984 | 4.503922037  |
| C | 10.568894301 | 3.843614956 | 5.940868077  |
| O | 9.871902888  | 2.834184057 | 6.053232585  |
| C | 11.345257507 | 7.718820620 | 5.554662007  |



|   |              |              |              |
|---|--------------|--------------|--------------|
| O | 11.067511574 | 8.911735890  | 5.447771734  |
| N | 11.074073767 | 4.614561319  | 6.989516405  |
| C | 12.004030725 | 5.648275338  | 6.527688342  |
| H | 13.010089255 | 5.476614635  | 6.966235605  |
| N | 11.587115721 | 7.030007409  | 6.746307239  |
| C | 10.937605032 | 4.208679633  | 8.383723221  |
| H | 10.516325589 | 3.187678952  | 8.385927245  |
| H | 11.943067999 | 4.197839476  | 8.854971335  |
| C | 11.673258642 | 7.711768815  | 8.029618387  |
| H | 11.677714887 | 8.796251687  | 7.819592832  |
| H | 12.621563849 | 7.420498953  | 8.528840140  |
| N | 10.053882082 | 5.045697850  | 9.186905477  |
| C | 10.481666582 | 6.295159308  | 9.818790343  |
| H | 11.447008326 | 6.142770155  | 10.346675357 |
| N | 10.564367571 | 7.458018146  | 8.939122698  |
| C | 8.821311509  | 4.595979862  | 9.663876315  |
| O | 8.269515144  | 3.534237754  | 9.364708399  |
| C | 9.629834182  | 8.446259126  | 9.258658338  |
| O | 9.534970688  | 9.554249818  | 8.735199632  |
| N | 8.339457712  | 5.549586597  | 10.563253402 |
| C | 9.285454091  | 6.646917153  | 10.780190775 |
| H | 9.574200750  | 6.693286536  | 11.851625329 |
| N | 8.852704077  | 7.962489794  | 10.315914176 |
| C | 7.183873544  | 5.304822167  | 11.419315119 |
| H | 7.477143533  | 5.488056207  | 12.474676003 |
| H | 6.900149763  | 4.245204984  | 11.290987723 |
| C | 7.929755266  | 8.818845078  | 11.047521795 |
| H | 8.092164714  | 9.850708926  | 10.687941649 |
| H | 8.162669294  | 8.756352355  | 12.131835089 |
| N | 6.003605189  | 6.104544953  | 11.113004727 |
| C | 5.802466562  | 7.476893017  | 11.583153126 |
| H | 6.033867895  | 7.544086974  | 12.667475785 |
| N | 6.519235270  | 8.515641283  | 10.848364452 |
| C | 4.835375458  | 5.538112573  | 10.602074506 |
| O | 4.692860495  | 4.368385058  | 10.240224385 |
| C | 5.661783909  | 9.393863204  | 10.178131550 |
| O | 5.993570959  | 10.404966838 | 9.563192142  |
| N | 3.845698337  | 6.522187118  | 10.607417700 |
| C | 4.291599965  | 7.764704775  | 11.241858338 |
| H | 3.667337420  | 7.980366677  | 12.134954048 |
| N | 4.355482074  | 8.937670876  | 10.375258814 |

|   |             |              |              |
|---|-------------|--------------|--------------|
| C | 2.452640604 | 6.224291194  | 10.300916021 |
| H | 2.368349997 | 5.126744027  | 10.210212908 |
| H | 1.814714099 | 6.581427872  | 11.136851857 |
| C | 3.194990894 | 9.731059991  | 9.992188975  |
| H | 2.512614562 | 9.812619242  | 10.864316096 |
| H | 3.566808444 | 10.732559861 | 9.711346693  |
| C | 5.854103325 | 5.034899031  | 5.895151520  |
| C | 4.800313789 | 2.938814311  | 4.786798112  |
| H | 5.365646679 | 3.180462706  | 3.875358873  |
| H | 3.796461377 | 3.387889742  | 4.738365055  |
| H | 4.710677118 | 1.842953041  | 4.879939167  |
| C | 6.822875303 | 2.640052702  | 6.137326750  |
| H | 6.539856912 | 1.589688823  | 6.322323878  |
| H | 7.418549696 | 3.009656139  | 6.985314514  |
| H | 7.399884531 | 2.705815805  | 5.203979354  |
| C | 4.685893931 | 3.136811410  | 7.229845090  |
| H | 3.772810761 | 3.752756556  | 7.223743022  |
| H | 5.257398540 | 3.325903325  | 8.149921230  |
| H | 4.408859719 | 2.070037765  | 7.178275035  |
| C | 6.378030684 | 5.555858556  | 7.257383959  |
| H | 7.292559614 | 5.011224392  | 7.550079955  |
| H | 5.629640392 | 5.387532039  | 8.049658635  |
| C | 4.561492940 | 5.801371962  | 5.511903289  |
| H | 3.757031946 | 5.608621368  | 6.243791237  |
| H | 4.195834814 | 5.467165186  | 4.525295186  |
| C | 6.928275326 | 5.294539439  | 4.805112825  |
| H | 6.583266962 | 4.926877467  | 3.821307304  |
| H | 7.868086099 | 4.767141675  | 5.044377687  |
| C | 6.682974151 | 7.077121355  | 7.163727724  |
| H | 7.055844708 | 7.409165088  | 8.151504634  |
| C | 4.858524462 | 7.327983230  | 5.439857287  |
| H | 3.912895578 | 7.844180323  | 5.186189932  |
| C | 7.220556909 | 6.822155370  | 4.713017254  |
| H | 7.988110291 | 6.972930876  | 3.929778479  |
| C | 5.921072147 | 7.580130468  | 4.340295892  |
| H | 6.118978170 | 8.665155883  | 4.227840290  |
| H | 5.539761827 | 7.224930696  | 3.361494910  |
| C | 7.758644099 | 7.323027231  | 6.077727227  |
| H | 8.022530646 | 8.398494260  | 6.025471053  |
| H | 8.690110873 | 6.782789814  | 6.343683648  |
| C | 5.378457397 | 7.832354593  | 6.808921936  |

|   |             |             |             |
|---|-------------|-------------|-------------|
| H | 5.555116135 | 8.926378820 | 6.780262215 |
| H | 4.616406484 | 7.656268096 | 7.594732143 |
| N | 5.540309514 | 3.442974066 | 6.011494061 |

Coordinates of the minimized geometry of CB[7]•14.

E: -3054875.68327804 kcal/mol

|   |              |              |              |
|---|--------------|--------------|--------------|
| N | 22.556730482 | 22.367650304 | 25.461006285 |
| C | 22.563136639 | 21.081868247 | 26.304861912 |
| H | 23.597608915 | 20.968691332 | 26.671733841 |
| H | 22.338095333 | 20.241680790 | 25.625990789 |
| C | 21.575631742 | 21.116379705 | 27.474583544 |
| H | 21.730855742 | 20.164367054 | 28.015520779 |
| H | 20.531373270 | 21.092461505 | 27.102771436 |
| C | 21.797110650 | 22.331867688 | 28.407641692 |
| H | 22.818215651 | 22.237224452 | 28.842124415 |
| C | 21.773717924 | 23.625226623 | 27.557138461 |
| H | 20.747881087 | 23.837791018 | 27.194413657 |
| H | 22.075914933 | 24.503363430 | 28.157845161 |
| C | 22.758742455 | 23.580162313 | 26.385611477 |
| H | 22.669469462 | 24.486683811 | 25.763010234 |
| H | 23.797019396 | 23.508644095 | 26.752596850 |
| C | 23.724112362 | 22.308579831 | 24.497908777 |
| H | 23.597890184 | 21.431590631 | 23.840932423 |
| H | 24.657645906 | 22.219454087 | 25.077862476 |
| H | 23.734892517 | 23.233961321 | 23.897640036 |
| C | 21.274342996 | 22.492963675 | 24.662087475 |
| H | 20.399604124 | 22.549339227 | 25.325211018 |
| H | 21.183747500 | 21.607754977 | 24.010985630 |
| H | 21.333010279 | 23.411329905 | 24.054869665 |
| N | 20.165378662 | 22.327540919 | 32.579735551 |
| C | 19.924800770 | 21.114661016 | 31.670916831 |
| H | 20.049740270 | 20.213694596 | 32.294966463 |
| H | 18.861921549 | 21.170380937 | 31.374662214 |
| C | 20.844461552 | 21.076140379 | 30.445759151 |
| H | 21.893018381 | 20.870321312 | 30.747358938 |
| H | 20.523932652 | 20.198056549 | 29.852232254 |
| C | 20.789787297 | 22.371025907 | 29.593111037 |
| H | 19.761881714 | 22.458024672 | 29.169974281 |
| C | 21.026045220 | 23.592816438 | 30.519555007 |
| H | 20.834116938 | 24.540293058 | 29.979614581 |

|   |              |              |              |
|---|--------------|--------------|--------------|
| H | 22.092635481 | 23.629884297 | 30.825883393 |
| C | 20.107473368 | 23.614896518 | 31.746494983 |
| H | 20.360664053 | 24.449716387 | 32.421849733 |
| H | 19.048707662 | 23.733451955 | 31.453811116 |
| C | 19.055697815 | 22.376589529 | 33.610310254 |
| H | 19.085516073 | 21.448438180 | 34.205520628 |
| H | 18.089883474 | 22.463515201 | 33.085097977 |
| H | 19.217630541 | 23.250903129 | 34.262861321 |
| C | 21.498360378 | 22.207879207 | 33.288827554 |
| H | 21.639764136 | 23.084993996 | 33.939028624 |
| H | 22.308081851 | 22.185903374 | 32.550200876 |
| H | 21.517569780 | 21.267394095 | 33.860931946 |
| N | 26.325841998 | 23.032976601 | 29.820002863 |
| C | 26.692113242 | 22.611322399 | 31.171431181 |
| H | 27.716297040 | 22.963056357 | 31.417087372 |
| N | 25.758302043 | 22.996024790 | 32.230601402 |
| C | 26.004975652 | 21.957403651 | 28.988863053 |
| O | 25.702405030 | 22.025745923 | 27.794037602 |
| C | 25.166413757 | 21.894125591 | 32.848889447 |
| O | 24.441640660 | 21.921934736 | 33.844700875 |
| N | 26.124077623 | 20.787593593 | 29.743016909 |
| C | 26.556817866 | 21.044879473 | 31.116418292 |
| H | 27.505309656 | 20.506601555 | 31.324848595 |
| N | 25.570983549 | 20.752248146 | 32.157159603 |
| C | 26.191017376 | 19.465355631 | 29.130161108 |
| H | 27.106848298 | 18.955089918 | 29.497349107 |
| H | 26.258499738 | 19.604773486 | 28.036689508 |
| C | 25.253042622 | 19.410007540 | 32.626054069 |
| H | 26.194318580 | 18.834842527 | 32.752719575 |
| H | 24.752709423 | 19.524489937 | 33.604060263 |
| N | 25.036963709 | 18.615278214 | 29.378518472 |
| C | 24.825775218 | 17.863792121 | 30.617978475 |
| H | 25.744045385 | 17.301344065 | 30.888658818 |
| N | 24.360504776 | 18.649163583 | 31.759159054 |
| C | 24.197063263 | 18.197291232 | 28.346056967 |
| O | 24.233250452 | 18.586095020 | 27.177702996 |
| C | 23.037571835 | 18.361490294 | 32.106515054 |
| O | 22.408152680 | 18.852053497 | 33.045410654 |
| N | 23.336130936 | 17.232048812 | 28.867046990 |
| C | 23.596365913 | 16.942182334 | 30.275231230 |
| H | 23.797327002 | 15.858895541 | 30.412510090 |

|   |              |              |              |
|---|--------------|--------------|--------------|
| N | 22.569153092 | 17.389335974 | 31.218892351 |
| C | 22.396282488 | 16.494078678 | 28.034522440 |
| H | 22.472027280 | 15.414341213 | 28.277876972 |
| H | 22.691256604 | 16.661974511 | 26.983550514 |
| C | 21.324694751 | 16.664554183 | 31.447551093 |
| H | 21.530775708 | 15.575170710 | 31.388317243 |
| H | 20.972442122 | 16.921567490 | 32.462397875 |
| N | 21.005232642 | 16.910628005 | 28.164014932 |
| C | 20.097613186 | 16.408778912 | 29.192512396 |
| H | 20.164862941 | 15.301953604 | 29.254812835 |
| N | 20.247440495 | 16.997378334 | 30.525686706 |
| C | 20.345063050 | 17.630587020 | 27.165201883 |
| O | 20.850526405 | 18.081909258 | 26.137977116 |
| C | 19.100791602 | 17.671301732 | 30.945575120 |
| O | 18.904416581 | 18.145205447 | 32.065980963 |
| N | 18.997468607 | 17.712990805 | 27.526636221 |
| C | 18.686923940 | 16.929944420 | 28.724097743 |
| H | 17.972434658 | 16.116838929 | 28.475398222 |
| N | 18.203787733 | 17.688055432 | 29.877355932 |
| C | 17.986099819 | 18.205287286 | 26.599878252 |
| H | 17.197529850 | 17.433040301 | 26.477597142 |
| H | 18.492734508 | 18.379293271 | 25.633924147 |
| C | 16.843521240 | 18.189758561 | 30.017907808 |
| H | 16.134879426 | 17.425129377 | 29.637057056 |
| H | 16.670876711 | 18.356757488 | 31.095991007 |
| N | 17.356357426 | 19.459188409 | 26.989270408 |
| C | 16.232243199 | 19.552340130 | 27.919510473 |
| H | 15.454135462 | 18.803949301 | 27.660877016 |
| N | 16.579265727 | 19.452200469 | 29.337763220 |
| C | 17.602207460 | 20.656620087 | 26.316087184 |
| O | 18.460393058 | 20.841405538 | 25.451183466 |
| C | 16.368298457 | 20.645196521 | 30.029902879 |
| O | 16.540086379 | 20.825141896 | 31.238363453 |
| N | 16.675687520 | 21.595714277 | 26.772209380 |
| C | 15.755395463 | 21.045170427 | 27.765762903 |
| H | 14.705755357 | 21.147055379 | 27.418817832 |
| N | 15.898456179 | 21.589215213 | 29.116787119 |
| C | 16.468627009 | 22.870870784 | 26.099724057 |
| H | 15.390955700 | 22.972806927 | 25.851627062 |
| H | 17.063718576 | 22.849214485 | 25.169748824 |
| C | 15.324262832 | 22.859842104 | 29.539862042 |

|   |              |              |              |
|---|--------------|--------------|--------------|
| H | 15.243345294 | 22.831269410 | 30.640850399 |
| H | 14.312308895 | 22.959075502 | 29.093360157 |
| N | 16.888151106 | 24.044876160 | 26.852670498 |
| C | 16.068813241 | 24.682864149 | 27.881491996 |
| H | 15.019960085 | 24.784530371 | 27.532166749 |
| N | 16.106162903 | 24.040322679 | 29.196026672 |
| C | 17.970702565 | 24.833295548 | 26.459313364 |
| O | 18.793770339 | 24.555455817 | 25.585168386 |
| C | 16.715052638 | 24.836113019 | 30.166797719 |
| O | 16.838183564 | 24.557911673 | 31.362317884 |
| N | 17.930850865 | 26.010270248 | 27.208204909 |
| C | 16.793453879 | 26.059355858 | 28.126237584 |
| H | 16.159839629 | 26.944507564 | 27.908400195 |
| N | 17.131028587 | 26.016140211 | 29.549304736 |
| C | 18.769612759 | 27.158688852 | 26.894300501 |
| H | 19.249266358 | 26.958294116 | 25.919713567 |
| H | 18.126085289 | 28.060583104 | 26.818254005 |
| C | 17.606034605 | 27.169567465 | 30.304277190 |
| H | 17.048013557 | 28.068741797 | 29.969939514 |
| H | 17.394188369 | 26.972385351 | 31.370143277 |
| N | 19.840778540 | 27.414379416 | 27.848537677 |
| C | 19.656130442 | 28.164201056 | 29.092892080 |
| H | 19.096874599 | 29.103169523 | 28.895078235 |
| N | 19.034899655 | 27.431827506 | 30.194974719 |
| C | 21.185943440 | 27.293870187 | 27.488659016 |
| O | 21.616742175 | 26.831988557 | 26.432417213 |
| C | 19.913122610 | 27.210723079 | 31.256116146 |
| O | 19.627876806 | 26.698201173 | 32.339890505 |
| N | 21.949172494 | 27.827505538 | 28.529568579 |
| C | 21.130400050 | 28.401206383 | 29.594071969 |
| H | 21.385281683 | 29.472579202 | 29.737257868 |
| N | 21.164185144 | 27.699751051 | 30.880116317 |
| C | 23.392044428 | 28.007271407 | 28.425711171 |
| H | 23.649025461 | 29.038759345 | 28.742879000 |
| H | 23.663300910 | 27.863685586 | 27.364750204 |
| C | 22.272819030 | 27.779159021 | 31.821572419 |
| H | 22.659604355 | 28.819807987 | 31.841280781 |
| H | 21.871956934 | 27.512078244 | 32.815592336 |
| N | 24.184715000 | 27.064129505 | 29.202557845 |
| C | 24.476927208 | 27.206666604 | 30.626906140 |
| H | 24.856248688 | 28.228176407 | 30.840268371 |

|   |              |              |              |
|---|--------------|--------------|--------------|
| N | 23.379987140 | 26.873633209 | 31.538957560 |
| C | 24.868496372 | 26.000615004 | 28.614340494 |
| O | 24.843742910 | 25.689332626 | 27.422712135 |
| C | 23.671386104 | 25.778992553 | 32.357093294 |
| O | 22.959987837 | 25.337900137 | 33.261225955 |
| N | 25.617396573 | 25.376541539 | 29.612546466 |
| C | 25.530038670 | 26.068894136 | 30.900484860 |
| H | 26.529006257 | 26.447668401 | 31.202896252 |
| N | 24.931320068 | 25.299271956 | 31.988678857 |
| C | 26.615988177 | 24.365182592 | 29.301687739 |
| H | 27.600281184 | 24.688953421 | 29.701945286 |
| H | 26.669260181 | 24.293154185 | 28.201021212 |
| C | 25.673198439 | 24.336922870 | 32.794689608 |
| H | 26.698580162 | 24.730787473 | 32.956861883 |
| H | 25.153940022 | 24.241797094 | 33.764856848 |

Coordinates of the minimized geometry of CB[7]•**3b**.

E: -3200452.2507658 kcal/mol

|   |              |              |             |
|---|--------------|--------------|-------------|
| N | 2.014131664  | 6.912822888  | 9.032960448 |
| C | 1.501483892  | 8.278776410  | 8.919484814 |
| H | 0.800009888  | 8.492858705  | 9.753240041 |
| N | 2.508118466  | 9.337140606  | 8.825261284 |
| C | 1.678122312  | 6.122169168  | 7.932588522 |
| O | 1.893636180  | 4.914044252  | 7.814394265 |
| C | 2.460012226  | 10.012398318 | 7.604017286 |
| O | 3.098056487  | 11.023025298 | 7.305515752 |
| N | 1.026647063  | 6.934592054  | 7.003294536 |
| C | 0.817442979  | 8.294773556  | 7.501469510 |
| H | -0.268527318 | 8.524687904  | 7.534768111 |
| N | 1.534551783  | 9.353972833  | 6.791913287 |
| C | 0.325045940  | 6.382934118  | 5.847079784 |
| H | 0.322834325  | 5.283980845  | 5.957515851 |
| H | -0.718382210 | 6.762414385  | 5.849545568 |
| C | 1.120172482  | 9.883997250  | 5.500257349 |
| H | 1.590932375  | 10.877250548 | 5.392411570 |
| H | 0.014843920  | 9.989270937  | 5.486716946 |
| N | 0.938503115  | 6.679808306  | 4.559475582 |
| C | 0.759908749  | 7.943678305  | 3.844406185 |
| H | -0.318220375 | 8.204844668  | 3.793864409 |
| N | 1.528690509  | 9.082533276  | 4.350244917 |

|   |              |              |              |
|---|--------------|--------------|--------------|
| C | 1.516725312  | 5.689186510  | 3.762115462  |
| O | 1.658267743  | 4.503552827  | 4.064163120  |
| C | 2.469990600  | 9.542143415  | 3.426640034  |
| O | 3.176497396  | 10.544534925 | 3.550997140  |
| N | 1.876781361  | 6.280818542  | 2.549474203  |
| C | 1.406622524  | 7.661921319  | 2.436912289  |
| H | 0.690596950  | 7.753653774  | 1.593028011  |
| N | 2.445895381  | 8.685826488  | 2.325538896  |
| C | 2.373233570  | 5.504223628  | 1.421240738  |
| H | 1.735424278  | 5.701605196  | 0.534039408  |
| H | 2.298457199  | 4.439227117  | 1.704178435  |
| C | 3.126313202  | 9.011701917  | 1.074821651  |
| H | 3.494247482  | 10.049576485 | 1.160499182  |
| H | 2.393600085  | 8.941020586  | 0.243654239  |
| N | 3.764782002  | 5.764355638  | 1.063524316  |
| C | 4.180603127  | 6.845445741  | 0.168116232  |
| H | 3.518779794  | 6.877136995  | -0.723172894 |
| N | 4.278535453  | 8.175353715  | 0.769990021  |
| C | 4.767446481  | 4.809381302  | 1.247037190  |
| O | 4.654095671  | 3.751228797  | 1.868447092  |
| C | 5.582625241  | 8.677344831  | 0.756691866  |
| O | 5.925930911  | 9.816256223  | 1.075241373  |
| N | 5.908820255  | 5.250216436  | 0.575718521  |
| C | 5.675822723  | 6.487475055  | -0.170333952 |
| H | 5.858096084  | 6.318616702  | -1.252704503 |
| N | 6.418740155  | 7.662047940  | 0.287208183  |
| C | 7.060121876  | 4.380042866  | 0.352209643  |
| H | 6.774668326  | 3.364176353  | 0.678258588  |
| H | 7.293481200  | 4.372503355  | -0.733309158 |
| C | 7.831657337  | 7.881439438  | 0.008677798  |
| H | 8.021980403  | 8.962190576  | 0.133379716  |
| H | 8.046919536  | 7.582093883  | -1.038630790 |
| N | 8.256883631  | 4.747282387  | 1.095723162  |
| C | 9.186162685  | 5.793207956  | 0.667936719  |
| H | 9.456310723  | 5.650941334  | -0.399852366 |
| N | 8.748465605  | 7.170958393  | 0.895195719  |
| C | 8.779427125  | 3.945974419  | 2.114074346  |
| O | 8.267139277  | 2.922468048  | 2.568672970  |
| C | 9.550563861  | 7.839415988  | 1.822473273  |
| O | 9.465062771  | 9.029257077  | 2.130643410  |
| N | 10.002327793 | 4.500879338  | 2.499161560  |



|   |              |             |              |
|---|--------------|-------------|--------------|
| C | 10.402498830 | 5.625195757 | 1.652796466  |
| H | 11.360734676 | 5.395069448 | 1.140767414  |
| N | 10.487373405 | 6.928234195 | 2.314241099  |
| C | 10.897666083 | 3.840604501 | 3.439741024  |
| H | 10.474386606 | 2.840962670 | 3.643268586  |
| H | 11.899605234 | 3.734569243 | 2.973348130  |
| C | 11.630846264 | 7.352695428 | 3.115724085  |
| H | 11.647195422 | 8.456945039 | 3.109542423  |
| H | 12.558455582 | 6.963530043 | 2.645320069  |
| N | 11.049110977 | 4.519487680 | 4.722765199  |
| C | 12.004799459 | 5.601292983 | 4.958934190  |
| H | 12.991510747 | 5.340265700 | 4.521058121  |
| N | 11.590777715 | 6.930699196 | 4.508862046  |
| C | 10.540960257 | 3.986939133 | 5.908839599  |
| O | 9.791178079  | 3.014371027 | 6.005761195  |
| C | 11.460373101 | 7.839335536 | 5.561770846  |
| O | 11.243709684 | 9.047687810 | 5.457471149  |
| N | 11.060711672 | 4.732941395 | 6.969537052  |
| C | 12.027853460 | 5.738661667 | 6.526533989  |
| H | 13.022563750 | 5.534913192 | 6.976187715  |
| N | 11.650362122 | 7.133663037 | 6.752350113  |
| C | 10.928946544 | 4.297740348 | 8.355578926  |
| H | 10.486186948 | 3.286076478 | 8.342367193  |
| H | 11.939218828 | 4.256630482 | 8.814756717  |
| C | 11.740035615 | 7.794354387 | 8.047922141  |
| H | 11.770584369 | 8.881792283 | 7.857405843  |
| H | 12.677260246 | 7.476326152 | 8.551012172  |
| N | 10.068041426 | 5.135243826 | 9.179839783  |
| C | 10.518574496 | 6.372631584 | 9.817249098  |
| H | 11.484604730 | 6.203440119 | 10.338285101 |
| N | 10.616915333 | 7.543481531 | 8.945388737  |
| C | 8.849765452  | 4.680727259 | 9.687936532  |
| O | 8.300252855  | 3.612096479 | 9.413238774  |
| C | 9.705174663  | 8.542801653 | 9.288936055  |
| O | 9.636646589  | 9.667386303 | 8.790598301  |
| N | 8.380543000  | 5.641702095 | 10.586526061 |
| C | 9.333586894  | 6.733515585 | 10.788714616 |
| H | 9.634270471  | 6.784082780 | 11.856525613 |
| N | 8.904811206  | 8.053035564 | 10.323501042 |
| C | 7.222512999  | 5.411304518 | 11.442239660 |
| H | 7.510451408  | 5.606874769 | 12.496467387 |

|   |             |              |              |
|---|-------------|--------------|--------------|
| H | 6.935418542 | 4.351297566  | 11.324902239 |
| C | 7.988164156 | 8.911735018  | 11.062732014 |
| H | 8.165886837 | 9.947931410  | 10.724560742 |
| H | 8.212567300 | 8.829117643  | 12.147075476 |
| N | 6.047707762 | 6.213076581  | 11.117061582 |
| C | 5.844868075 | 7.586219022  | 11.580666881 |
| H | 6.063948448 | 7.658089654  | 12.666966166 |
| N | 6.574728389 | 8.623455559  | 10.851078296 |
| C | 4.880903930 | 5.646190165  | 10.601905765 |
| O | 4.734194773 | 4.474697025  | 10.249902062 |
| C | 5.726155005 | 9.510421132  | 10.186767659 |
| O | 6.068246273 | 10.531544512 | 9.586245052  |
| N | 3.896982462 | 6.637127547  | 10.586414880 |
| C | 4.340195424 | 7.878529595  | 11.221145727 |
| H | 3.707346763 | 8.102319878  | 12.105791776 |
| N | 4.417383112 | 9.051602276  | 10.349487893 |
| C | 2.504334477 | 6.337941523  | 10.281180318 |
| H | 2.419207892 | 5.240352863  | 10.193269257 |
| H | 1.864977974 | 6.697325333  | 11.114821441 |
| C | 3.257466138 | 9.850062292  | 9.966188369  |
| H | 2.576522176 | 9.932993781  | 10.839217044 |
| H | 3.627592112 | 10.852011771 | 9.685096697  |
| N | 5.397378361 | 3.060631659  | 6.069978285  |
| C | 5.749391318 | 4.631265043  | 5.902711314  |
| C | 4.611733136 | 2.544694231  | 4.875043711  |
| H | 5.136518200 | 2.794294712  | 3.940222873  |
| H | 3.607775859 | 2.996123449  | 4.865376112  |
| H | 4.527888289 | 1.449817917  | 4.978855818  |
| C | 6.662996973 | 2.227018674  | 6.188699775  |
| H | 6.360832120 | 1.195820135  | 6.437310944  |
| H | 7.304872978 | 2.629295595  | 6.987500219  |
| H | 7.204728139 | 2.236212881  | 5.231527089  |
| C | 4.560999029 | 2.814794171  | 7.317130305  |
| H | 3.679969416 | 3.476520791  | 7.319763341  |
| H | 5.166408599 | 2.999037039  | 8.216833406  |
| H | 4.235811515 | 1.761024539  | 7.295039251  |
| C | 6.270468218 | 5.189583069  | 7.247348922  |
| H | 7.167276577 | 4.637659519  | 7.578338072  |
| H | 5.510547375 | 5.077850820  | 8.037981599  |
| C | 4.482125869 | 5.408674820  | 5.477430474  |
| H | 3.664352329 | 5.264825902  | 6.205218943  |

|   |             |              |             |
|---|-------------|--------------|-------------|
| H | 4.119874059 | 5.050219023  | 4.499948570 |
| C | 6.837404817 | 4.823060896  | 4.818888433 |
| H | 6.498642889 | 4.423094857  | 3.846836559 |
| H | 7.764429179 | 4.291075400  | 5.091998437 |
| C | 6.612337711 | 6.691554596  | 7.098259560 |
| H | 6.987139145 | 7.059377771  | 8.075672220 |
| C | 4.811981761 | 6.916228145  | 5.355265592 |
| H | 3.882179584 | 7.450324744  | 5.075645191 |
| C | 7.159528859 | 6.332078544  | 4.669820829 |
| H | 7.936137637 | 6.440970973  | 3.887178573 |
| N | 7.097027046 | 10.776296730 | 5.329748113 |
| C | 7.866690893 | 11.272999182 | 6.544416416 |
| H | 8.871616093 | 10.826704604 | 6.557905071 |
| H | 7.325506687 | 11.009105154 | 7.467169648 |
| H | 7.945795094 | 12.370070156 | 6.461396673 |
| C | 5.828575392 | 11.607379354 | 5.213708999 |
| H | 6.130004100 | 12.642262669 | 4.979690655 |
| H | 5.277417235 | 11.586358575 | 6.166006019 |
| H | 5.188342504 | 11.212862786 | 4.409278913 |
| C | 7.943972723 | 11.048139596 | 4.097299952 |
| H | 7.344236572 | 10.876619176 | 3.190539148 |
| H | 8.824536656 | 10.388127258 | 4.091093779 |
| H | 8.265686299 | 12.102382932 | 4.138534341 |
| C | 6.241558157 | 8.647787759  | 4.112061444 |
| H | 7.010731546 | 8.752505401  | 3.328821767 |
| H | 5.345292404 | 9.197961374  | 3.774923815 |
| C | 8.027705285 | 8.419954511  | 5.868392574 |
| H | 8.427789021 | 8.784131132  | 6.829539592 |
| H | 8.821337384 | 8.551395676  | 5.112048594 |
| C | 5.658563359 | 9.000983939  | 6.535032385 |
| H | 4.733317067 | 9.520976035  | 6.237758781 |
| H | 5.971006636 | 9.421770493  | 7.506352030 |
| C | 5.897039492 | 7.144333501  | 4.266104238 |
| H | 5.517241502 | 6.778707035  | 3.292037688 |
| C | 7.695809925 | 6.913783540  | 6.007490039 |
| H | 8.623531471 | 6.382496618  | 6.301933713 |
| C | 5.345596721 | 7.494306773  | 6.694550532 |
| H | 4.575019119 | 7.383261799  | 7.484385916 |
| C | 6.754800877 | 9.200557157  | 5.463250282 |

Coordinates of the minimized geometry of CB[7]•**3c**.

|   |          |          |          |
|---|----------|----------|----------|
| N | 2.00900  | 6.90900  | 9.03700  |
| C | 1.50900  | 8.27700  | 8.91600  |
| H | 0.80300  | 8.49400  | 9.74800  |
| N | 2.50800  | 9.34100  | 8.82600  |
| C | 1.62800  | 6.10700  | 7.95700  |
| O | 1.75900  | 4.88500  | 7.88000  |
| C | 2.43200  | 10.04000 | 7.61800  |
| O | 3.01200  | 11.09200 | 7.35000  |
| N | 1.02100  | 6.93100  | 7.00500  |
| C | 0.82500  | 8.29400  | 7.49700  |
| H | -0.26100 | 8.52700  | 7.53500  |
| N | 1.53600  | 9.35700  | 6.79000  |
| C | 0.32200  | 6.38400  | 5.84800  |
| H | 0.32100  | 5.28500  | 5.95800  |
| H | -0.72300 | 6.76300  | 5.84700  |
| C | 1.11400  | 9.88700  | 5.50000  |
| H | 1.58400  | 10.88200 | 5.39200  |
| H | 0.00700  | 9.99200  | 5.49200  |
| N | 0.93900  | 6.67900  | 4.56200  |
| C | 0.76600  | 7.94300  | 3.84800  |
| H | -0.31500 | 8.19900  | 3.79200  |
| N | 1.52100  | 9.09300  | 4.34700  |
| C | 1.48600  | 5.67900  | 3.75100  |
| O | 1.56300  | 4.48300  | 4.02800  |
| C | 2.42600  | 9.58200  | 3.40000  |
| O | 3.05800  | 10.63500 | 3.47900  |
| N | 1.87700  | 6.27800  | 2.55000  |
| C | 1.41400  | 7.66000  | 2.44100  |
| H | 0.69400  | 7.75000  | 1.59800  |
| N | 2.44300  | 8.69200  | 2.32300  |
| C | 2.36900  | 5.50400  | 1.41800  |
| H | 1.72700  | 5.70200  | 0.53300  |
| H | 2.29700  | 4.43800  | 1.70100  |
| C | 3.12300  | 9.01300  | 1.07200  |
| H | 3.49000  | 10.05100 | 1.15900  |
| H | 2.39200  | 8.94100  | 0.23800  |
| N | 3.76000  | 5.75900  | 1.05800  |
| C | 4.18100  | 6.84700  | 0.17600  |
| H | 3.52300  | 6.88100  | -0.72000 |
| N | 4.27800  | 8.17900  | 0.77100  |
| C | 4.74700  | 4.77800  | 1.19700  |

|   |          |         |          |
|---|----------|---------|----------|
| O | 4.60500  | 3.68000 | 1.73200  |
| C | 5.57800  | 8.69100 | 0.72800  |
| O | 5.91100  | 9.84700 | 0.98500  |
| N | 5.90600  | 5.24500 | 0.57000  |
| C | 5.67700  | 6.48900 | -0.16300 |
| H | 5.85600  | 6.32400 | -1.24800 |
| N | 6.42000  | 7.66500 | 0.28800  |
| C | 7.05900  | 4.37900 | 0.34800  |
| H | 6.77200  | 3.36300 | 0.67500  |
| H | 7.29700  | 4.37100 | -0.73700 |
| C | 7.83200  | 7.88200 | 0.00600  |
| H | 8.02400  | 8.96200 | 0.13200  |
| H | 8.04400  | 7.58300 | -1.04300 |
| N | 8.25300  | 4.74500 | 1.09700  |
| C | 9.17900  | 5.79400 | 0.67500  |
| H | 9.45300  | 5.64800 | -0.39300 |
| N | 8.75100  | 7.17500 | 0.89100  |
| C | 8.79100  | 3.92500 | 2.09500  |
| O | 8.31000  | 2.87000 | 2.50600  |
| C | 9.58800  | 7.85700 | 1.78000  |
| O | 9.56600  | 9.06300 | 2.01500  |
| N | 10.00100 | 4.49700 | 2.50100  |
| C | 10.39700 | 5.62500 | 1.66000  |
| H | 11.35300 | 5.39200 | 1.14300  |
| N | 10.49200 | 6.93100 | 2.31100  |
| C | 10.89900 | 3.84000 | 3.44000  |
| H | 10.47600 | 2.84000 | 3.64500  |
| H | 11.90100 | 3.73400 | 2.97100  |
| C | 11.63500 | 7.35200 | 3.11400  |
| H | 11.64900 | 8.45700 | 3.10600  |
| H | 12.56500 | 6.96200 | 2.64600  |
| N | 11.04900 | 4.51600 | 4.72400  |
| C | 11.99500 | 5.60400 | 4.95900  |
| H | 12.98500 | 5.34300 | 4.52300  |
| N | 11.59100 | 6.93400 | 4.50800  |
| C | 10.58400 | 3.94900 | 5.91400  |
| O | 9.91400  | 2.92300 | 6.01500  |
| C | 11.49100 | 7.85000 | 5.56100  |
| O | 11.34000 | 9.06600 | 5.45500  |
| N | 11.06600 | 4.72500 | 6.97200  |
| C | 12.02000 | 5.74100 | 6.52700  |

|   |          |          |          |
|---|----------|----------|----------|
| H | 13.01900 | 5.54000  | 6.97200  |
| N | 11.64900 | 7.13600  | 6.75300  |
| C | 10.93300 | 4.29600  | 8.35900  |
| H | 10.49100 | 3.28400  | 8.34500  |
| H | 11.94300 | 4.25700  | 8.82300  |
| C | 11.74100 | 7.79400  | 8.05000  |
| H | 11.77100 | 8.88200  | 7.85900  |
| H | 12.68000 | 7.47500  | 8.55200  |
| N | 10.06700 | 5.13200  | 9.17900  |
| C | 10.51200 | 6.37300  | 9.81000  |
| H | 11.47700 | 6.20300  | 10.33500 |
| N | 10.61800 | 7.54800  | 8.94700  |
| C | 8.86600  | 4.65800  | 9.71700  |
| O | 8.35600  | 3.56000  | 9.50100  |
| C | 9.73800  | 8.56600  | 9.32400  |
| O | 9.73000  | 9.71700  | 8.89100  |
| N | 8.37900  | 5.63800  | 10.58800 |
| C | 9.32700  | 6.73400  | 10.78200 |
| H | 9.63200  | 6.78200  | 11.85000 |
| N | 8.90500  | 8.05800  | 10.32700 |
| C | 7.22200  | 5.41100  | 11.44500 |
| H | 7.51100  | 5.60800  | 12.50000 |
| H | 6.93500  | 4.35100  | 11.32800 |
| C | 7.98800  | 8.91300  | 11.06900 |
| H | 8.16700  | 9.94900  | 10.73100 |
| H | 8.21200  | 8.82900  | 12.15400 |
| N | 6.04700  | 6.20900  | 11.11800 |
| C | 5.84600  | 7.58500  | 11.57200 |
| H | 6.06100  | 7.65700  | 12.66000 |
| N | 6.57600  | 8.62800  | 10.85300 |
| C | 4.86600  | 5.62900  | 10.64500 |
| O | 4.69800  | 4.44200  | 10.37400 |
| C | 5.72200  | 9.54100  | 10.22600 |
| O | 6.05400  | 10.60300 | 9.70100  |
| N | 3.89400  | 6.63300  | 10.58800 |
| C | 4.34100  | 7.87700  | 11.21200 |
| H | 3.71100  | 8.10100  | 12.10000 |
| N | 4.41700  | 9.05500  | 10.34900 |
| C | 2.50000  | 6.33800  | 10.28600 |
| H | 2.41400  | 5.24000  | 10.19700 |
| H | 1.86100  | 6.69800  | 11.12200 |

|   |         |          |          |
|---|---------|----------|----------|
| C | 3.25500 | 9.85100  | 9.96900  |
| H | 2.57300 | 9.93400  | 10.84300 |
| H | 3.62600 | 10.85300 | 9.68800  |
| C | 5.39300 | 3.02200  | 6.07300  |
| C | 5.74000 | 4.58100  | 5.90700  |
| C | 4.59200 | 2.49000  | 4.85100  |
| H | 5.09600 | 2.70900  | 3.89100  |
| H | 3.58000 | 2.93100  | 4.79100  |
| H | 4.47700 | 1.38700  | 4.93200  |
| C | 6.68800 | 2.16900  | 6.19600  |
| H | 6.42000 | 1.11800  | 6.43700  |
| H | 7.35800 | 2.53800  | 6.99500  |
| H | 7.27200 | 2.16300  | 5.25700  |
| C | 4.53900 | 2.76800  | 7.34800  |
| H | 3.63900 | 3.41000  | 7.39000  |
| H | 5.11000 | 2.95100  | 8.27700  |
| H | 4.19900 | 1.70900  | 7.36300  |
| C | 6.27100 | 5.18900  | 7.24000  |
| H | 7.16800 | 4.63300  | 7.57300  |
| H | 5.51400 | 5.06900  | 8.03600  |
| C | 4.48800 | 5.40700  | 5.47900  |
| H | 3.66500 | 5.25800  | 6.20300  |
| H | 4.12000 | 5.04200  | 4.50300  |
| C | 6.83200 | 4.82500  | 4.82000  |
| H | 6.49400 | 4.42000  | 3.84800  |
| H | 7.75900 | 4.28500  | 5.08500  |
| C | 6.61200 | 6.68800  | 7.09500  |
| H | 6.99000 | 7.06800  | 8.07000  |
| C | 4.81300 | 6.91200  | 5.35400  |
| H | 3.88700 | 7.45700  | 5.07300  |
| C | 7.15700 | 6.33000  | 4.66800  |
| H | 7.93500 | 6.45000  | 3.88500  |
| C | 7.10800 | 10.81300 | 5.32500  |
| C | 7.89700 | 11.32200 | 6.56700  |
| H | 8.91200 | 10.88700 | 6.62300  |
| H | 7.38500 | 11.08100 | 7.51800  |
| H | 8.00300 | 12.42700 | 6.51200  |
| C | 5.81400 | 11.66600 | 5.20600  |
| H | 6.08200 | 12.72200 | 4.98200  |
| H | 5.22100 | 11.66100 | 6.14000  |
| H | 5.14600 | 11.30900 | 4.40100  |

|   |         |          |         |
|---|---------|----------|---------|
| C | 7.97700 | 11.09300 | 4.06700 |
| H | 7.41900 | 10.91200 | 3.12900 |
| H | 8.88300 | 10.45900 | 4.03300 |
| H | 8.30600 | 12.15500 | 4.06800 |
| C | 6.24100 | 8.64800  | 4.11800 |
| H | 7.00700 | 8.76100  | 3.32900 |
| H | 5.34700 | 9.20300  | 3.77600 |
| C | 8.02300 | 8.42000  | 5.86300 |
| H | 8.43200 | 8.79000  | 6.82000 |
| H | 8.81800 | 8.55600  | 5.10600 |
| C | 5.66400 | 9.00000  | 6.53100 |
| H | 4.73900 | 9.52800  | 6.23900 |
| H | 5.97500 | 9.42500  | 7.50300 |
| C | 5.89800 | 7.14700  | 4.26500 |
| H | 5.51600 | 6.77100  | 3.29300 |
| C | 7.69500 | 6.91700  | 6.00400 |
| H | 8.62000 | 6.37400  | 6.29700 |
| C | 5.34800 | 7.49700  | 6.69200 |
| H | 4.57500 | 7.37400  | 7.48100 |
| C | 6.76600 | 9.25000  | 5.45800 |

Coordinates of the minimized geometry of CB[7]•9.

E: -3100400.05066236 kcal/mol

|   |              |              |              |
|---|--------------|--------------|--------------|
| N | 24.197490481 | 6.841380275  | 12.366777466 |
| C | 24.194828640 | 8.164794266  | 11.746011328 |
| H | 23.151242647 | 8.502243330  | 11.570755480 |
| N | 24.948682568 | 9.199137888  | 12.456910380 |
| C | 24.927113318 | 5.903071557  | 11.634579837 |
| O | 25.066986745 | 4.710881567  | 11.915296820 |
| C | 26.032983288 | 9.679871445  | 11.718475567 |
| O | 26.763872401 | 10.621097046 | 12.027694478 |
| N | 25.424449118 | 6.551839707  | 10.501890481 |
| C | 25.022618831 | 7.955192535  | 10.426141456 |
| H | 24.439798048 | 8.136839138  | 9.498354238  |
| N | 26.104335814 | 8.931505213  | 10.540294667 |
| C | 26.022704560 | 5.838594532  | 9.384225133  |
| H | 25.832308623 | 4.761991113  | 9.539455252  |
| H | 25.536890192 | 6.172345946  | 8.443843507  |
| C | 27.000608033 | 9.277454503  | 9.444794239  |
| H | 27.399294729 | 10.286025565 | 9.654016662  |



|   |              |             |              |
|---|--------------|-------------|--------------|
| H | 26.421298772 | 9.291215265 | 8.498456695  |
| N | 27.462770819 | 6.006997576 | 9.254623683  |
| C | 28.116105862 | 7.117662432 | 8.560722165  |
| H | 27.669573488 | 7.257380355 | 7.554002050  |
| N | 28.147970408 | 8.392193765 | 9.281328086  |
| C | 28.348505095 | 4.989912269 | 9.602361644  |
| O | 28.051868770 | 3.920061071 | 10.137825301 |
| C | 29.440693196 | 8.782947916 | 9.629536282  |
| O | 29.758000317 | 9.845075393 | 10.170641939 |
| N | 29.623410748 | 5.384009928 | 9.205072784  |
| C | 29.632866170 | 6.681117312 | 8.527092782  |
| H | 30.044506811 | 6.574900379 | 7.501540474  |
| N | 30.312126198 | 7.769109670 | 9.234046237  |
| C | 30.759099387 | 4.476657126 | 9.283540559  |
| H | 31.314813695 | 4.515621593 | 8.323738898  |
| H | 30.355247537 | 3.460667177 | 9.439428656  |
| C | 31.760072674 | 7.905067754 | 9.344487437  |
| H | 32.221745643 | 7.614792259 | 8.378130696  |
| H | 31.968627078 | 8.969324262 | 9.553891672  |
| N | 31.682835233 | 4.749462482 | 10.373422168 |
| C | 32.766731092 | 5.725250151 | 10.272700691 |
| H | 33.328340295 | 5.577470103 | 9.326028101  |
| N | 32.374210387 | 7.125989539 | 10.411394644 |
| C | 31.795795135 | 3.922901974 | 11.493949828 |
| O | 31.052688333 | 2.984894515 | 11.789120688 |
| C | 32.859392073 | 7.708821249 | 11.584986790 |
| O | 32.743719360 | 8.889948959 | 11.912047592 |
| N | 32.937099473 | 4.321168659 | 12.192605774 |
| C | 33.619061570 | 5.450944688 | 11.564920942 |
| H | 34.677987464 | 5.189528054 | 11.355342410 |
| N | 33.545296473 | 6.718912277 | 12.293793712 |
| C | 33.540077429 | 3.497033710 | 13.230405206 |
| H | 34.609984723 | 3.336774439 | 12.976953401 |
| H | 33.010575817 | 2.527962771 | 13.233543264 |
| C | 34.403098367 | 7.036289185 | 13.426049601 |
| H | 34.387185759 | 8.133897590 | 13.547550717 |
| H | 35.438922892 | 6.702023470 | 13.198515415 |
| N | 33.451177692 | 4.036941748 | 14.578035944 |
| C | 34.336487637 | 5.079786922 | 15.087405492 |
| H | 35.389407930 | 4.857220589 | 14.812038389 |
| N | 33.994645961 | 6.450706041 | 14.697563723 |

|   |              |             |              |
|---|--------------|-------------|--------------|
| C | 32.714977154 | 3.410973498 | 15.584308983 |
| O | 31.962538231 | 2.446241938 | 15.441824189 |
| C | 33.632515299 | 7.240898992 | 15.791695224 |
| O | 33.377867746 | 8.446757371 | 15.770274978 |
| N | 33.028806080 | 4.039616992 | 16.791509180 |
| C | 34.070197670 | 5.058476887 | 16.636971020 |
| H | 34.962002551 | 4.786920971 | 17.240783496 |
| N | 33.665703471 | 6.429536765 | 16.926862756 |
| C | 32.631805167 | 3.479691613 | 18.077487456 |
| H | 33.536930474 | 3.339507014 | 18.705604226 |
| H | 32.164305035 | 2.500010683 | 17.873325542 |
| C | 33.557912883 | 6.958998807 | 18.276353701 |
| H | 34.395421511 | 6.556935377 | 18.884641477 |
| H | 33.640938888 | 8.058118241 | 18.208252366 |
| N | 31.663096437 | 4.271305808 | 18.825260753 |
| C | 32.019948546 | 5.416831930 | 19.662427081 |
| H | 32.870043600 | 5.154228343 | 20.326833581 |
| N | 32.301591748 | 6.666066161 | 18.951962763 |
| C | 30.338929288 | 3.869284081 | 18.994976937 |
| O | 29.800392877 | 2.889945478 | 18.474243231 |
| C | 31.378309966 | 7.669810211 | 19.238369130 |
| O | 31.417167359 | 8.833597832 | 18.835544526 |
| N | 29.737343351 | 4.757508970 | 19.890936337 |
| C | 30.685283390 | 5.733427650 | 20.436829415 |
| H | 30.767979385 | 5.611817588 | 21.537359717 |
| N | 30.423947664 | 7.129811726 | 20.100756687 |
| C | 28.402355732 | 4.531429480 | 20.434890808 |
| H | 28.447337901 | 4.606882868 | 21.541437107 |
| H | 28.100142169 | 3.509743766 | 20.143180027 |
| C | 29.397971381 | 7.946796145 | 20.730811690 |
| H | 29.345894251 | 7.690008743 | 21.808542571 |
| H | 29.701354900 | 9.001874812 | 20.611099777 |
| N | 27.375203994 | 5.441980085 | 19.940098579 |
| C | 27.116489640 | 6.767922003 | 20.509664689 |
| H | 27.021577844 | 6.698047942 | 21.613693517 |
| N | 28.071219113 | 7.811771719 | 20.149406094 |
| C | 26.358696515 | 5.021319697 | 19.077907750 |
| O | 26.270948362 | 3.910933390 | 18.549434351 |
| C | 27.524372494 | 8.784386918 | 19.311966575 |
| O | 28.100279414 | 9.790669262 | 18.895113863 |
| N | 25.448296223 | 6.069970763 | 18.953651143 |

|   |              |              |              |
|---|--------------|--------------|--------------|
| C | 25.792075456 | 7.221812655  | 19.787377925 |
| H | 24.958994602 | 7.450621544  | 20.484956207 |
| N | 26.197661854 | 8.433022697  | 19.070748430 |
| C | 24.179438499 | 5.926072593  | 18.251195355 |
| H | 23.364887500 | 6.292415840  | 18.911038137 |
| H | 24.039027671 | 4.849525047  | 18.047848562 |
| C | 25.270932391 | 9.355893901  | 18.430775438 |
| H | 25.786106556 | 10.329442611 | 18.350831283 |
| H | 24.368861458 | 9.460425946  | 19.069908846 |
| N | 24.098545731 | 6.617115210  | 16.970529550 |
| C | 23.764639260 | 8.036503763  | 16.833359473 |
| H | 22.887087896 | 8.284749749  | 17.467446698 |
| N | 24.852415916 | 8.973736343  | 17.092052219 |
| C | 23.996089011 | 5.925371265  | 15.761644218 |
| O | 24.111353051 | 4.708720269  | 15.608792896 |
| C | 25.270890283 | 9.654305683  | 15.947438863 |
| O | 26.127034841 | 10.539798044 | 15.903219149 |
| N | 23.683242311 | 6.854426095  | 14.768751274 |
| C | 23.500963176 | 8.205030651  | 15.292479422 |
| H | 22.481632459 | 8.574788840  | 15.051668148 |
| N | 24.503493399 | 9.189214301  | 14.876178319 |
| C | 23.280859373 | 6.453768690  | 13.429897808 |
| H | 22.281379892 | 6.886354919  | 13.209151804 |
| H | 23.216109672 | 5.351409496  | 13.426910081 |
| C | 24.425346273 | 9.912657920  | 13.612676423 |
| H | 25.023176350 | 10.834759357 | 13.722321754 |
| H | 23.362673917 | 10.178339551 | 13.421667627 |
| C | 27.671500801 | 2.498135301  | 12.959466537 |
| H | 26.906873524 | 3.151405300  | 12.509407851 |
| H | 27.371298829 | 1.441914559  | 12.864951564 |
| H | 28.651316562 | 2.658004751  | 12.481246263 |
| C | 26.414897081 | 2.549258665  | 15.085030532 |
| H | 26.471939780 | 2.737596865  | 16.168650493 |
| H | 26.135867576 | 1.500248664  | 14.889404020 |
| H | 25.690498576 | 3.247089165  | 14.634912347 |
| C | 28.831071124 | 1.862143412  | 15.042672961 |
| H | 29.800961147 | 2.080442554  | 14.566914873 |
| H | 28.511583814 | 0.825760806  | 14.842441890 |
| H | 28.912809598 | 2.036774266  | 16.126761936 |
| N | 27.781223505 | 2.799846175  | 14.447333950 |
| C | 28.192239962 | 4.231548558  | 14.717979025 |

|   |              |              |              |
|---|--------------|--------------|--------------|
| C | 28.412167539 | 5.125073311  | 13.680857452 |
| H | 28.295305246 | 4.840110030  | 12.630940945 |
| C | 28.806218691 | 6.466672011  | 13.978090435 |
| C | 29.047186072 | 7.425250245  | 12.948763840 |
| H | 28.917000079 | 7.126804764  | 11.901386051 |
| C | 29.438217979 | 8.720462980  | 13.251713573 |
| H | 29.614152426 | 9.420945615  | 12.427506136 |
| C | 28.344749330 | 4.625409358  | 16.079318279 |
| H | 28.166535628 | 3.922330312  | 16.898680342 |
| C | 28.727356507 | 5.922298437  | 16.383237177 |
| H | 28.846434522 | 6.222556448  | 17.432630492 |
| C | 28.971100478 | 6.875835716  | 15.350706951 |
| C | 29.372039105 | 8.213876487  | 15.648092625 |
| H | 29.487964176 | 8.494434255  | 16.698915773 |
| C | 29.600439849 | 9.107870977  | 14.614111201 |
| N | 30.033369150 | 10.530492488 | 14.895915078 |
| C | 30.160704954 | 10.814920960 | 16.385001215 |
| H | 29.185769700 | 10.661416979 | 16.875403579 |
| H | 30.476894443 | 11.865413278 | 16.488637941 |
| H | 30.917986925 | 10.146600023 | 16.825519576 |
| C | 28.991889276 | 11.490430190 | 14.319799809 |
| H | 28.893142994 | 11.322559620 | 13.237016806 |
| H | 29.332170235 | 12.519694100 | 14.523381163 |
| H | 28.027702079 | 11.279742686 | 14.812933849 |
| C | 31.400110320 | 10.766275960 | 14.251716245 |
| H | 32.114379247 | 10.057736707 | 14.704464595 |
| H | 31.691892493 | 11.811358501 | 14.449683053 |
| H | 31.335822378 | 10.579908781 | 13.169332848 |

Plot of  $\Delta G_{\text{exptl}}$  versus  $\Delta G_{\text{calcd}}$

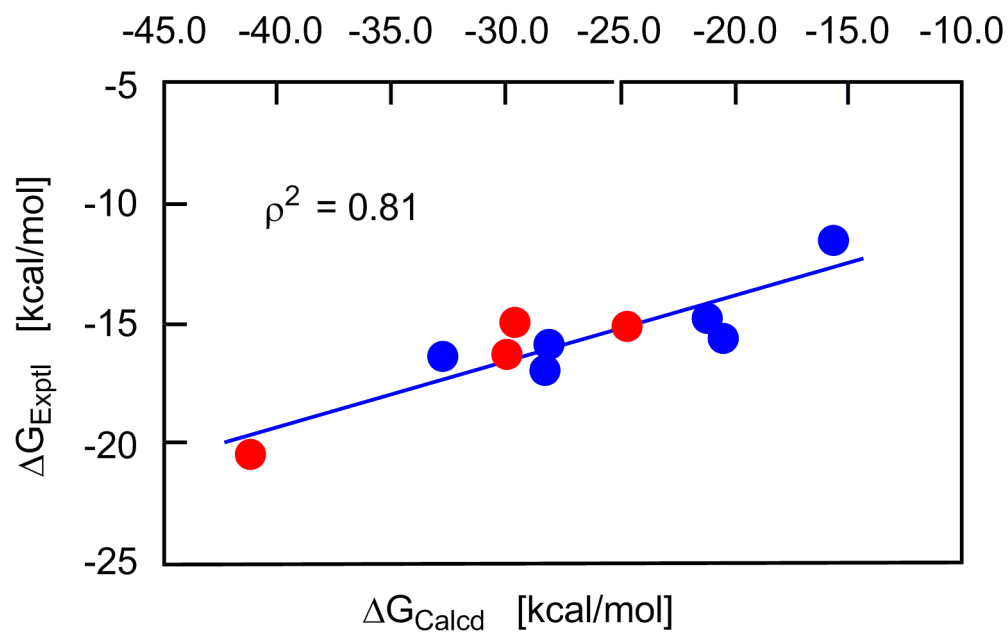

**Figure S20.** Least squares linear plot of  $\Delta G_{\text{Exptl}}$  versus  $\Delta G_{\text{calcd}}$ ,  $r^2 = 0.81$ , calculated for a set of ten CB[7]•guest complexes. The red circles are the four  $-di(^+NMe_3)$  complexes in Tables 2-3.

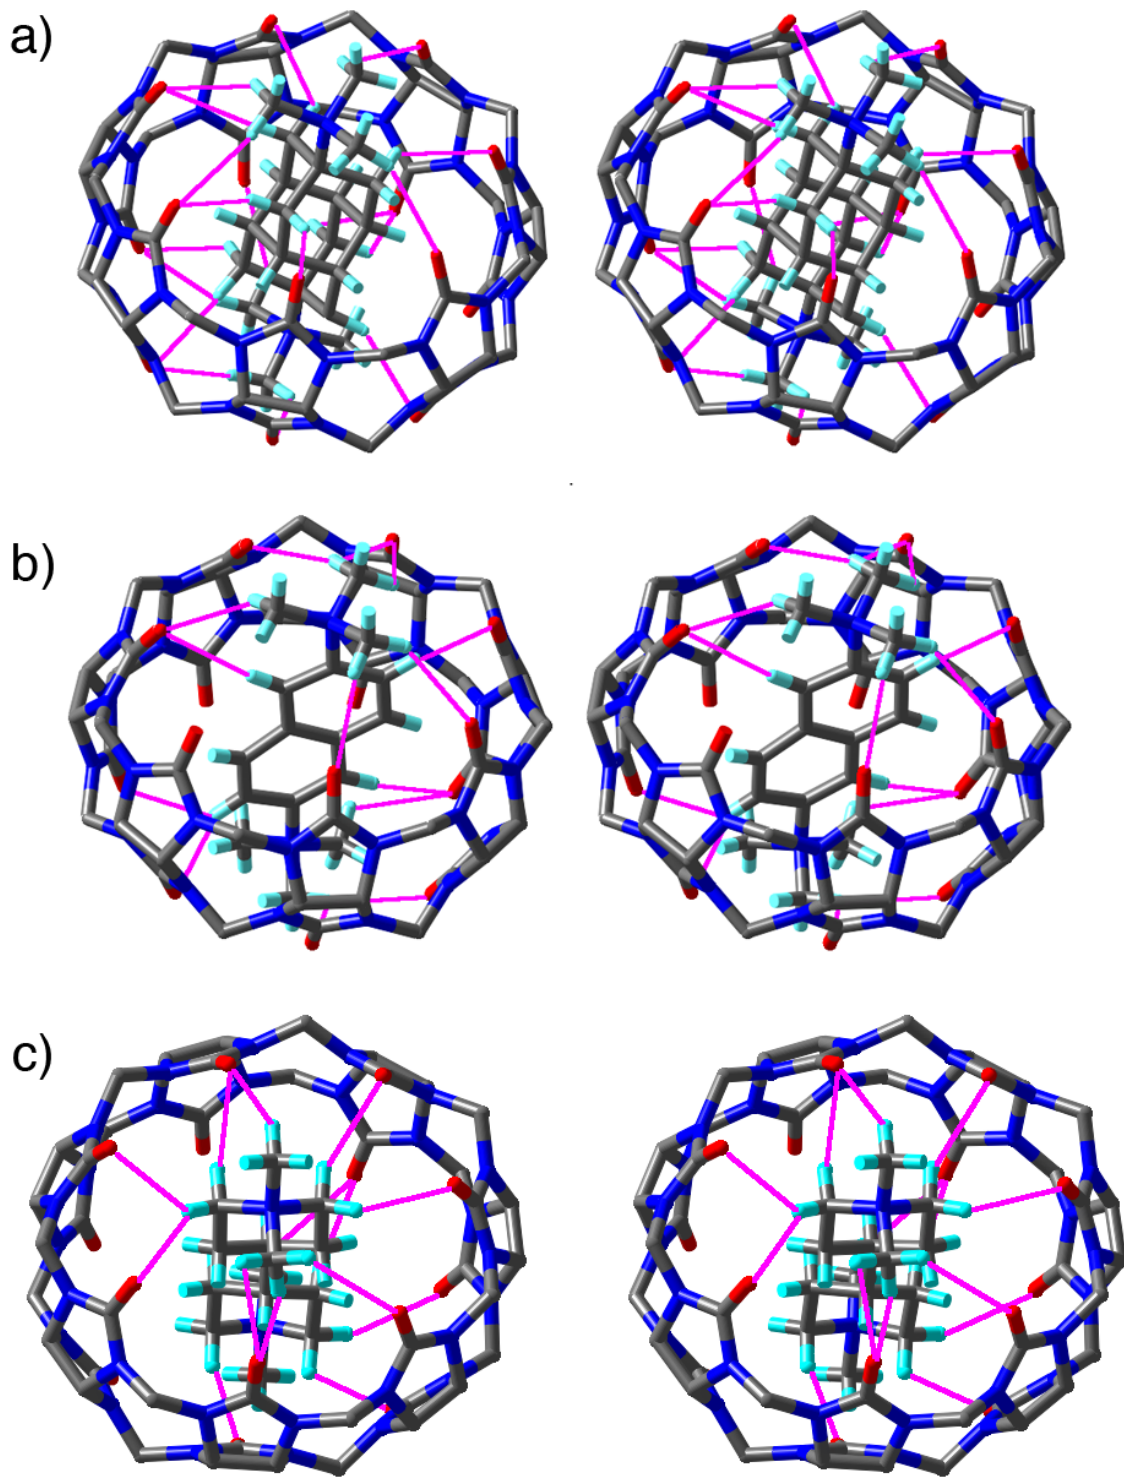

**Figure S21.** Stereoviews rendered from the x-crystal structures of: a) CB[7]•**3b**, b) CB[7]•**9**, and c) CB[7]•**14** to illustrate the presence of numerous C-H...O=C close contacts ( $\leq 2.70\text{\AA}$ ). Color code: C, grey; H, light blue; N, blue; O, red; C-H...O=C close contacts, magenta.
